# Supplementary material for: Relationship between tumor size and metastatic site in patients with stage IV non-small cell lung cancer: A large SEER-based study
Source: PeerJ. 2019 Oct 10;7:e7822. doi: 10.7717/peerj.7822 (PMC6790223; doi:10.7717/peerj.7822)
Supplement: Data S1 [file peerj-07-7822-s001.xls]

## Sheet: Sheet1
Age	Race	Sex	Histology	T stage	N stage	Tumor size (cm)	Bone metastasis	Brain metastasis	Liver metastasis	Lung metastasis
< 65	White	Male	Adenocarcinoma	T4	N3	≤3	No	No	No	Yes
≥ 65	White	Male	Adenocarcinoma	T1a	N3	≤3	No	No	Yes	No
< 65	White	Male	Adenocarcinoma	T2a	N2	≤3	No	Yes	No	No
< 65	White	Female	Adenocarcinoma	T1a	N2	≤3	No	Yes	No	Yes
≥ 65	White	Male	Adenocarcinoma	T4	N2	≤3	No	No	Yes	Yes
≥ 65	White	Female	Adenocarcinoma	T4	N2	≤3	Yes	No	No	Yes
≥ 65	White	Male	Adenocarcinoma	T1a	N2	≤3	No	Yes	No	No
< 65	White	Female	Adenocarcinoma	T1a	N1	≤3	No	Yes	No	No
< 65	White	Female	Adenocarcinoma	T3	N1	≤3	No	Yes	No	No
< 65	White	Male	Adenocarcinoma	T4	N3	≤3	No	Yes	No	No
< 65	White	Female	Adenocarcinoma	T2a	N3	≤3	No	Yes	No	Yes
< 65	Black	Male	Adenocarcinoma	T3	N2	≤3	Yes	Yes	No	Yes
≥ 65	Black	Male	Adenocarcinoma	T1a	N2	≤3	No	No	No	No
< 65	White	Male	Adenocarcinoma	T1a	N2	≤3	Yes	No	No	No
< 65	White	Male	Adenocarcinoma	T3	N2	≤3	Yes	No	No	Yes
≥ 65	White	Female	Adenocarcinoma	T4	N2	≤3	No	No	No	No
≥ 65	White	Female	Adenocarcinoma	T2a	N2	≤3	No	No	No	No
≥ 65	White	Female	Squamous	T2a	N2	≤3	No	No	No	No
≥ 65	White	Male	Adenocarcinoma	T3	N1	≤3	Yes	Yes	Yes	Yes
< 65	White	Female	Adenocarcinoma	T1a	N0	≤3	No	No	No	No
< 65	White	Female	Adenocarcinoma	T1a	N0	≤3	No	Yes	No	No
≥ 65	White	Female	Adenocarcinoma	T1a	N0	≤3	No	Yes	No	No
≥ 65	White	Male	Adenocarcinoma	T1a	N0	≤3	Yes	No	No	Yes
≥ 65	White	Female	Adenocarcinoma	T3	N0	≤3	No	No	No	No
≥ 65	Black	Female	Adenocarcinoma	T1a	N3	≤3	No	No	No	Yes
≥ 65	White	Female	Adenocarcinoma	T2a	N3	≤3	No	Yes	No	No
< 65	White	Male	Squamous	T1a	N3	≤3	No	Yes	No	No
≥ 65	White	Female	Squamous	T1a	N3	≤3	No	No	No	Yes
< 65	Others	Female	Adenocarcinoma	T4	N2	≤3	Yes	No	No	No
≥ 65	Others	Male	Adenocarcinoma	T1a	N2	≤3	No	No	Yes	No
≥ 65	Others	Female	Adenocarcinoma	T3	N2	≤3	Yes	No	No	Yes
< 65	Black	Male	Adenocarcinoma	T3	N2	≤3	No	No	No	No
< 65	White	Female	Adenocarcinoma	T1a	N2	≤3	No	No	No	Yes
< 65	White	Female	Adenocarcinoma	T1a	N2	≤3	No	Yes	No	No
< 65	White	Female	Adenocarcinoma	T1a	N2	≤3	Yes	No	Yes	No
< 65	White	Male	Adenocarcinoma	T2a	N2	≤3	Yes	No	No	No
≥ 65	White	Female	Adenocarcinoma	T1a	N2	≤3	No	No	No	No
< 65	White	Male	Adenocarcinoma	T1a	N1	≤3	No	Yes	No	No
< 65	Others	Female	Adenocarcinoma	T1a	N0	≤3	No	No	No	No
< 65	Black	Male	Adenocarcinoma	T1a	N0	≤3	No	Yes	No	No
< 65	Black	Male	Adenocarcinoma	T1a	N0	≤3	No	Yes	No	No
< 65	Black	Female	Squamous	T1a	N0	≤3	Yes	No	No	No
≥ 65	White	Male	Adenocarcinoma	T3	N0	≤3	No	No	No	No
< 65	White	Female	Adenocarcinoma	T3	N0	≤3	No	No	No	No
≥ 65	White	Female	Adenocarcinoma	T3	N0	≤3	No	Yes	No	No
≥ 65	White	Female	Adenocarcinoma	T1a	N0	≤3	No	No	No	No
≥ 65	White	Female	Adenocarcinoma	T1a	N0	≤3	Yes	No	No	No
< 65	White	Male	Squamous	T3	N0	≤3	Yes	No	No	Yes
< 65	Others	Male	Adenocarcinoma	T1a	N3	≤3	Yes	No	Yes	No
< 65	Others	Male	Adenocarcinoma	T1a	N3	≤3	No	No	No	No
≥ 65	Others	Female	Adenocarcinoma	T4	N3	≤3	No	Yes	No	Yes
≥ 65	Black	Male	Adenocarcinoma	T1a	N3	≤3	No	No	No	No
< 65	White	Male	Adenocarcinoma	T1a	N3	≤3	Yes	No	No	Yes
< 65	White	Male	Adenocarcinoma	T1a	N3	≤3	Yes	No	No	Yes
≥ 65	White	Female	Adenocarcinoma	T3	N3	≤3	No	No	No	Yes
≥ 65	White	Female	Adenocarcinoma	T1a	N3	≤3	No	No	No	No
≥ 65	Black	Male	Squamous	T3	N2	≤3	No	No	No	No
≥ 65	Black	Male	Squamous	T4	N2	≤3	Yes	No	No	No
< 65	White	Female	Adenocarcinoma	T4	N2	≤3	Yes	No	No	No
< 65	White	Female	Adenocarcinoma	T3	N2	≤3	No	No	No	No
< 65	White	Female	Adenocarcinoma	T4	N2	≤3	Yes	No	No	Yes
≥ 65	White	Male	Adenocarcinoma	T4	N2	≤3	No	No	Yes	No
≥ 65	White	Female	Adenocarcinoma	T3	N2	≤3	No	No	No	Yes
≥ 65	White	Female	Adenocarcinoma	T3	N2	≤3	No	Yes	No	No
≥ 65	White	Female	Adenocarcinoma	T1a	N2	≤3	No	No	No	Yes
≥ 65	White	Male	Adenocarcinoma	T3	N2	≤3	No	No	No	No
< 65	White	Female	Squamous	T1a	N2	≤3	No	Yes	No	No
≥ 65	White	Female	Squamous	T2a	N2	≤3	No	No	No	No
≥ 65	White	Male	Adenocarcinoma	T2a	N1	≤3	Yes	No	No	No
≥ 65	White	Male	Squamous	T3	N1	≤3	No	Yes	Yes	No
< 65	Others	Male	Adenocarcinoma	T4	N0	≤3	No	No	No	Yes
< 65	Others	Female	Adenocarcinoma	T2a	N0	≤3	No	No	No	Yes
≥ 65	Others	Male	Adenocarcinoma	T3	N0	≤3	No	Yes	Yes	Yes
≥ 65	Others	Male	Adenocarcinoma	T1a	N0	≤3	No	No	No	Yes
< 65	Black	Female	Adenocarcinoma	T4	N0	≤3	No	No	No	Yes
< 65	Black	Male	Adenocarcinoma	T3	N0	≤3	No	No	No	No
< 65	White	Female	Adenocarcinoma	T3	N0	≤3	No	No	No	Yes
< 65	White	Female	Adenocarcinoma	T4	N0	≤3	No	No	No	Yes
< 65	White	Female	Adenocarcinoma	T2a	N0	≤3	No	No	No	No
< 65	White	Male	Adenocarcinoma	T1a	N0	≤3	Yes	No	No	No
< 65	White	Female	Adenocarcinoma	T1a	N0	≤3	No	No	No	Yes
< 65	White	Female	Adenocarcinoma	T1a	N0	≤3	No	No	Yes	Yes
< 65	White	Male	Adenocarcinoma	T1a	N0	≤3	Yes	No	No	No
≥ 65	White	Female	Adenocarcinoma	T4	N0	≤3	No	Yes	No	No
≥ 65	White	Male	Adenocarcinoma	T4	N0	≤3	Yes	No	Yes	No
≥ 65	White	Male	Adenocarcinoma	T1a	N0	≤3	Yes	No	Yes	No
≥ 65	White	Male	Adenocarcinoma	T3	N0	≤3	No	Yes	No	Yes
≥ 65	White	Male	Adenocarcinoma	T4	N0	≤3	Yes	No	No	No
≥ 65	White	Female	Adenocarcinoma	T1a	N0	≤3	No	No	No	No
≥ 65	Others	Female	Adenocarcinoma	T3	N3	≤3	Yes	Yes	No	No
< 65	Black	Male	Adenocarcinoma	T2a	N3	≤3	No	No	No	No
< 65	Black	Male	Adenocarcinoma	T3	N3	≤3	No	No	No	No
< 65	White	Female	Adenocarcinoma	T4	N3	≤3	No	No	Yes	No
< 65	White	Female	Adenocarcinoma	T3	N3	≤3	Yes	No	Yes	Yes
≥ 65	White	Male	Adenocarcinoma	T4	N3	≤3	No	No	No	Yes
< 65	Black	Female	Adenocarcinoma	T3	N2	≤3	Yes	No	No	Yes
< 65	White	Female	Adenocarcinoma	T4	N2	≤3	No	Yes	No	No
< 65	White	Male	Adenocarcinoma	T1a	N2	≤3	No	No	Yes	No
< 65	White	Male	Adenocarcinoma	T3	N2	≤3	No	Yes	No	No
< 65	White	Female	Adenocarcinoma	T1a	N2	≤3	No	No	No	No
< 65	White	Female	Adenocarcinoma	T1a	N2	≤3	No	No	No	No
< 65	White	Male	Adenocarcinoma	T1a	N2	≤3	Yes	No	No	No
≥ 65	White	Male	Adenocarcinoma	T4	N2	≤3	No	No	No	Yes
≥ 65	White	Male	Adenocarcinoma	T4	N2	≤3	Yes	No	No	No
≥ 65	White	Female	Adenocarcinoma	T3	N2	≤3	No	No	No	No
≥ 65	White	Male	Adenocarcinoma	T1a	N2	≤3	No	Yes	Yes	No
≥ 65	White	Female	Adenocarcinoma	T4	N2	≤3	Yes	Yes	No	No
≥ 65	White	Male	Adenocarcinoma	T1a	N2	≤3	Yes	No	No	No
≥ 65	White	Male	Adenocarcinoma	T4	N2	≤3	Yes	No	No	Yes
≥ 65	White	Female	Adenocarcinoma	T2a	N2	≤3	No	No	No	No
≥ 65	White	Female	Adenocarcinoma	T4	N2	≤3	No	Yes	No	No
≥ 65	White	Female	Adenocarcinoma	T3	N2	≤3	No	No	No	Yes
≥ 65	White	Female	Adenocarcinoma	T3	N2	≤3	Yes	No	No	Yes
≥ 65	White	Female	Adenocarcinoma	T2a	N2	≤3	No	No	No	No
≥ 65	White	Male	Squamous	T3	N2	≤3	No	No	No	Yes
≥ 65	White	Male	Squamous	T4	N2	≤3	No	No	Yes	No
< 65	White	Male	Adenocarcinoma	T4	N1	≤3	Yes	No	Yes	Yes
< 65	White	Male	Adenocarcinoma	T2a	N1	≤3	No	Yes	No	No
≥ 65	White	Male	Adenocarcinoma	T1a	N1	≤3	Yes	No	No	No
≥ 65	White	Female	Squamous	T4	N1	≤3	Yes	No	Yes	No
≥ 65	Others	Female	Adenocarcinoma	T4	N0	≤3	No	No	No	No
≥ 65	Others	Male	Adenocarcinoma	T1a	N0	≤3	No	No	No	No
≥ 65	Others	Female	Adenocarcinoma	T3	N0	≤3	No	No	No	No
< 65	Black	Male	Adenocarcinoma	T4	N0	≤3	No	No	No	Yes
≥ 65	Black	Female	Adenocarcinoma	T1a	N0	≤3	Yes	No	No	No
< 65	White	Male	Adenocarcinoma	T1a	N0	≤3	Yes	Yes	No	No
< 65	White	Male	Adenocarcinoma	T1a	N0	≤3	Yes	No	No	No
< 65	White	Male	Adenocarcinoma	T4	N0	≤3	No	No	No	Yes
< 65	White	Male	Adenocarcinoma	T1a	N0	≤3	Yes	No	No	No
< 65	White	Male	Adenocarcinoma	T1a	N0	≤3	Yes	No	No	No
≥ 65	White	Female	Adenocarcinoma	T4	N0	≤3	No	No	No	No
≥ 65	White	Male	Adenocarcinoma	T4	N0	≤3	No	No	No	Yes
≥ 65	White	Male	Adenocarcinoma	T1a	N0	≤3	No	Yes	No	No
≥ 65	White	Female	Adenocarcinoma	T1a	N0	≤3	Yes	No	No	No
≥ 65	White	Male	Adenocarcinoma	T3	N0	≤3	No	No	No	No
≥ 65	White	Female	Adenocarcinoma	T3	N0	≤3	No	No	No	No
≥ 65	White	Female	Adenocarcinoma	T4	N0	≤3	No	No	No	Yes
≥ 65	White	Male	Squamous	T3	N0	≤3	No	No	No	No
≥ 65	White	Female	Squamous	T1a	N0	≤3	No	No	No	No
≥ 65	Black	Female	Adenocarcinoma	T4	N3	≤3	Yes	Yes	No	Yes
< 65	White	Female	Adenocarcinoma	T4	N3	≤3	Yes	No	No	No
< 65	White	Male	Adenocarcinoma	T4	N3	≤3	Yes	No	No	No
< 65	White	Female	Adenocarcinoma	T4	N3	≤3	Yes	Yes	No	No
< 65	White	Male	Adenocarcinoma	T3	N3	≤3	Yes	No	No	No
< 65	White	Female	Adenocarcinoma	T3	N3	≤3	Yes	No	Yes	No
< 65	White	Male	Adenocarcinoma	T1a	N3	≤3	No	No	No	No
≥ 65	White	Male	Adenocarcinoma	T3	N3	≤3	Yes	Yes	No	No
≥ 65	White	Male	Adenocarcinoma	T2a	N3	≤3	No	No	No	No
≥ 65	White	Female	Adenocarcinoma	T1a	N3	≤3	No	No	Yes	No
≥ 65	White	Male	Adenocarcinoma	T4	N3	≤3	No	No	No	No
≥ 65	White	Female	Adenocarcinoma	T4	N3	≤3	Yes	No	No	No
≥ 65	White	Female	Adenocarcinoma	T2a	N3	≤3	Yes	No	Yes	No
≥ 65	White	Female	Adenocarcinoma	T4	N3	≤3	No	No	No	No
≥ 65	White	Male	Adenocarcinoma	T3	N3	≤3	No	No	No	No
≥ 65	White	Female	Adenocarcinoma	T4	N3	≤3	No	No	No	No
< 65	Others	Male	Adenocarcinoma	T3	N2	≤3	Yes	No	No	Yes
< 65	Black	Male	Adenocarcinoma	T3	N2	≤3	No	No	No	Yes
≥ 65	Black	Male	Adenocarcinoma	T3	N2	≤3	Yes	No	No	No
≥ 65	Black	Male	Adenocarcinoma	T1a	N2	≤3	No	No	No	No
< 65	White	Male	Adenocarcinoma	T4	N2	≤3	Yes	No	Yes	Yes
< 65	White	Male	Adenocarcinoma	T4	N2	≤3	Yes	No	No	No
< 65	White	Female	Adenocarcinoma	T3	N2	≤3	Yes	No	Yes	No
< 65	White	Female	Adenocarcinoma	T1a	N2	≤3	No	Yes	No	No
< 65	White	Male	Adenocarcinoma	T4	N2	≤3	No	No	Yes	Yes
< 65	White	Female	Adenocarcinoma	T3	N2	≤3	No	No	No	Yes
< 65	White	Female	Adenocarcinoma	T1a	N2	≤3	No	Yes	No	No
< 65	White	Male	Adenocarcinoma	T1a	N2	≤3	Yes	No	No	No
< 65	White	Female	Adenocarcinoma	T1a	N2	≤3	Yes	No	Yes	No
< 65	White	Female	Adenocarcinoma	T1a	N2	≤3	No	No	No	No
≥ 65	White	Female	Adenocarcinoma	T2a	N2	≤3	No	No	No	Yes
≥ 65	White	Male	Adenocarcinoma	T3	N2	≤3	No	No	No	No
≥ 65	White	Female	Adenocarcinoma	T2a	N2	≤3	No	No	No	No
≥ 65	White	Female	Adenocarcinoma	T2a	N2	≤3	Yes	No	No	No
≥ 65	White	Male	Adenocarcinoma	T1a	N2	≤3	No	Yes	No	No
≥ 65	White	Female	Adenocarcinoma	T1a	N2	≤3	No	Yes	No	No
≥ 65	White	Female	Adenocarcinoma	T1a	N2	≤3	No	Yes	No	Yes
≥ 65	White	Female	Adenocarcinoma	T3	N2	≤3	Yes	Yes	No	No
≥ 65	White	Female	Adenocarcinoma	T2a	N2	≤3	Yes	No	Yes	No
≥ 65	White	Male	Squamous	T1a	N2	≤3	Yes	No	No	No
≥ 65	White	Male	Squamous	T3	N2	≤3	Yes	No	Yes	Yes
≥ 65	White	Female	Squamous	T1a	N2	≤3	No	No	No	No
≥ 65	White	Female	Adenocarcinoma	T3	N1	≤3	No	Yes	No	No
≥ 65	White	Female	Squamous	T4	N1	≤3	No	No	Yes	Yes
< 65	Others	Male	Adenocarcinoma	T3	N0	≤3	Yes	No	Yes	No
< 65	Others	Female	Adenocarcinoma	T4	N0	≤3	Yes	No	No	No
≥ 65	Others	Female	Adenocarcinoma	T1a	N0	≤3	No	No	No	No
≥ 65	Others	Female	Squamous	T4	N0	≤3	No	No	No	Yes
< 65	Black	Male	Adenocarcinoma	T4	N0	≤3	No	No	No	Yes
< 65	Black	Male	Adenocarcinoma	T1a	N0	≤3	Yes	No	No	No
< 65	Black	Male	Adenocarcinoma	T2a	N0	≤3	No	No	No	No
≥ 65	Black	Male	Adenocarcinoma	T1a	N0	≤3	No	Yes	No	No
≥ 65	Black	Female	Squamous	T4	N0	≤3	Yes	Yes	No	No
≥ 65	Black	Male	Squamous	T3	N0	≤3	No	No	No	No
< 65	White	Female	Adenocarcinoma	T1a	N0	≤3	No	Yes	No	No
< 65	White	Female	Adenocarcinoma	T1a	N0	≤3	Yes	No	No	No
< 65	White	Female	Adenocarcinoma	T4	N0	≤3	No	No	No	No
< 65	White	Male	Adenocarcinoma	T1a	N0	≤3	No	Yes	No	No
≥ 65	White	Male	Adenocarcinoma	T1a	N0	≤3	Yes	No	No	No
≥ 65	White	Female	Adenocarcinoma	T3	N0	≤3	No	Yes	No	No
≥ 65	White	Female	Adenocarcinoma	T1a	N0	≤3	No	No	Yes	No
≥ 65	White	Female	Adenocarcinoma	T1a	N0	≤3	Yes	No	No	No
≥ 65	White	Female	Squamous	T4	N0	≤3	No	No	Yes	No
≥ 65	White	Male	Squamous	T4	N0	≤3	No	No	No	No
< 65	Others	Female	Adenocarcinoma	T4	N3	≤3	Yes	Yes	No	No
< 65	Others	Male	Adenocarcinoma	T3	N3	≤3	No	No	No	No
≥ 65	Others	Female	Adenocarcinoma	T1a	N3	≤3	No	Yes	No	No
< 65	White	Female	Adenocarcinoma	T3	N3	≤3	No	Yes	No	No
< 65	White	Male	Adenocarcinoma	T1a	N3	≤3	No	Yes	No	No
< 65	White	Female	Adenocarcinoma	T4	N3	≤3	Yes	Yes	Yes	Yes
< 65	White	Female	Adenocarcinoma	T1a	N3	≤3	No	No	No	No
< 65	White	Female	Adenocarcinoma	T1a	N3	≤3	No	Yes	No	No
< 65	White	Female	Adenocarcinoma	T1a	N3	≤3	No	Yes	No	No
< 65	White	Male	Adenocarcinoma	T3	N3	≤3	No	No	No	Yes
< 65	White	Male	Adenocarcinoma	T2a	N3	≤3	Yes	No	No	No
< 65	White	Male	Adenocarcinoma	T1a	N3	≤3	Yes	No	Yes	Yes
≥ 65	White	Female	Adenocarcinoma	T1a	N3	≤3	No	Yes	No	No
≥ 65	White	Male	Adenocarcinoma	T1a	N3	≤3	Yes	No	No	No
≥ 65	White	Female	Adenocarcinoma	T4	N3	≤3	No	Yes	No	Yes
≥ 65	White	Female	Adenocarcinoma	T2a	N3	≤3	No	No	No	No
< 65	White	Male	Squamous	T1a	N3	≤3	Yes	No	No	No
< 65	White	Female	Squamous	T3	N3	≤3	No	No	Yes	No
≥ 65	White	Male	Squamous	T2a	N3	≤3	No	No	No	Yes
≥ 65	White	Female	Squamous	T3	N3	≤3	No	No	No	No
< 65	Others	Male	Adenocarcinoma	T4	N2	≤3	Yes	Yes	No	Yes
< 65	Others	Male	Adenocarcinoma	T3	N2	≤3	No	No	No	No
< 65	Others	Male	Adenocarcinoma	T3	N2	≤3	No	No	No	No
< 65	Black	Female	Adenocarcinoma	T3	N2	≤3	No	Yes	No	No
< 65	Black	Female	Adenocarcinoma	T1a	N2	≤3	No	Yes	No	No
< 65	Black	Female	Adenocarcinoma	T4	N2	≤3	No	No	No	Yes
< 65	Black	Female	Adenocarcinoma	T4	N2	≤3	No	Yes	No	Yes
< 65	Black	Female	Adenocarcinoma	T4	N2	≤3	Yes	No	No	Yes
< 65	Black	Male	Adenocarcinoma	T3	N2	≤3	No	No	No	Yes
< 65	Black	Male	Squamous	T1a	N2	≤3	No	No	No	Yes
< 65	Black	Male	Squamous	T3	N2	≤3	No	No	No	Yes
≥ 65	Black	Female	Squamous	T4	N2	≤3	Yes	No	Yes	Yes
< 65	White	Male	Adenocarcinoma	T3	N2	≤3	No	No	No	No
< 65	White	Female	Adenocarcinoma	T2a	N2	≤3	Yes	Yes	No	No
< 65	White	Male	Adenocarcinoma	T1a	N2	≤3	No	No	No	No
< 65	White	Female	Adenocarcinoma	T1a	N2	≤3	No	No	No	No
< 65	White	Female	Adenocarcinoma	T1a	N2	≤3	No	Yes	No	No
< 65	White	Female	Adenocarcinoma	T1a	N2	≤3	Yes	No	Yes	No
< 65	White	Male	Adenocarcinoma	T4	N2	≤3	No	No	No	No
< 65	White	Male	Adenocarcinoma	T4	N2	≤3	No	No	No	No
< 65	White	Male	Adenocarcinoma	T1a	N2	≤3	No	Yes	No	No
≥ 65	White	Female	Adenocarcinoma	T4	N2	≤3	No	No	Yes	No
≥ 65	White	Male	Adenocarcinoma	T3	N2	≤3	Yes	Yes	No	No
≥ 65	White	Female	Adenocarcinoma	T2a	N2	≤3	No	No	No	No
≥ 65	White	Female	Adenocarcinoma	T1a	N2	≤3	No	No	Yes	No
≥ 65	White	Female	Adenocarcinoma	T4	N2	≤3	No	No	No	No
≥ 65	White	Female	Adenocarcinoma	T4	N2	≤3	No	No	No	Yes
≥ 65	White	Female	Adenocarcinoma	T3	N2	≤3	Yes	No	Yes	No
≥ 65	White	Male	Adenocarcinoma	T4	N2	≤3	No	No	No	No
≥ 65	White	Male	Adenocarcinoma	T2a	N2	≤3	Yes	No	Yes	No
≥ 65	White	Female	Adenocarcinoma	T4	N2	≤3	No	No	No	No
≥ 65	White	Male	Adenocarcinoma	T4	N2	≤3	No	No	No	Yes
≥ 65	White	Female	Adenocarcinoma	T4	N2	≤3	No	No	No	Yes
≥ 65	White	Female	Squamous	T3	N2	≤3	Yes	No	No	Yes
< 65	White	Male	Squamous	T4	N2	≤3	No	No	No	No
< 65	White	Female	Squamous	T3	N2	≤3	No	Yes	No	Yes
< 65	White	Female	Squamous	T1a	N2	≤3	No	Yes	No	No
≥ 65	White	Male	Squamous	T4	N2	≤3	No	No	No	Yes
< 65	White	Female	Adenocarcinoma	T1a	N1	≤3	Yes	Yes	Yes	No
≥ 65	White	Female	Adenocarcinoma	T4	N1	≤3	Yes	No	No	No
≥ 65	Others	Female	Adenocarcinoma	T4	N0	≤3	No	No	No	No
≥ 65	Others	Female	Squamous	T1a	N0	≤3	No	No	No	No
< 65	Black	Male	Adenocarcinoma	T3	N0	≤3	No	Yes	No	Yes
≥ 65	Black	Male	Adenocarcinoma	T1a	N0	≤3	No	Yes	No	No
< 65	White	Female	Adenocarcinoma	T4	N0	≤3	No	No	No	Yes
< 65	White	Female	Adenocarcinoma	T4	N0	≤3	No	No	No	No
< 65	White	Female	Adenocarcinoma	T3	N0	≤3	No	Yes	No	No
< 65	White	Female	Adenocarcinoma	T1NOS	N0	≤3	No	Yes	No	No
< 65	White	Female	Adenocarcinoma	T1a	N0	≤3	No	No	Yes	No
< 65	White	Male	Adenocarcinoma	T1a	N0	≤3	No	Yes	No	No
< 65	White	Female	Adenocarcinoma	T1a	N0	≤3	No	Yes	No	No
< 65	White	Male	Adenocarcinoma	T3	N0	≤3	Yes	No	No	No
< 65	White	Female	Adenocarcinoma	T1a	N0	≤3	No	Yes	No	No
< 65	White	Male	Adenocarcinoma	T1a	N0	≤3	Yes	No	No	No
≥ 65	White	Male	Adenocarcinoma	T3	N0	≤3	No	Yes	No	Yes
≥ 65	White	Female	Adenocarcinoma	T2a	N0	≤3	No	No	Yes	No
≥ 65	White	Female	Adenocarcinoma	T1a	N0	≤3	No	No	No	No
≥ 65	White	Female	Adenocarcinoma	T1a	N0	≤3	No	No	Yes	No
≥ 65	White	Female	Adenocarcinoma	T1a	N0	≤3	Yes	No	Yes	No
≥ 65	White	Female	Adenocarcinoma	T4	N0	≤3	No	No	No	No
≥ 65	White	Female	Adenocarcinoma	T3	N0	≤3	No	No	No	Yes
≥ 65	White	Female	Adenocarcinoma	T1a	N0	≤3	No	No	No	No
≥ 65	White	Female	Adenocarcinoma	T4	N0	≤3	No	No	No	Yes
≥ 65	White	Female	Adenocarcinoma	T3	N0	≤3	Yes	No	No	Yes
≥ 65	White	Female	Adenocarcinoma	T3	N0	≤3	No	No	No	No
≥ 65	White	Female	Adenocarcinoma	T1a	N0	≤3	No	Yes	No	No
≥ 65	White	Male	Adenocarcinoma	T4	N0	≤3	No	No	No	No
< 65	White	Male	Squamous	T1a	N0	≤3	Yes	No	No	No
< 65	White	Male	Squamous	T1a	N0	≤3	No	No	Yes	Yes
≥ 65	White	Female	Squamous	T1a	N0	≤3	Yes	No	No	No
≥ 65	White	Male	Squamous	T1a	N0	≤3	Yes	No	No	No
≥ 65	White	Female	Squamous	T3	N0	≤3	No	No	No	No
< 65	Others	Female	Adenocarcinoma	T1a	N3	≤3	No	No	No	No
< 65	Others	Male	Adenocarcinoma	T1a	N3	≤3	Yes	Yes	Yes	No
≥ 65	Others	Male	Adenocarcinoma	T3	N3	≤3	No	Yes	No	No
≥ 65	Others	Male	Adenocarcinoma	T1a	N3	≤3	No	Yes	No	No
≥ 65	Others	Male	Adenocarcinoma	T1a	N3	≤3	No	No	No	No
< 65	Black	Male	Adenocarcinoma	T4	N3	≤3	No	No	No	No
< 65	Black	Female	Adenocarcinoma	T1a	N3	≤3	No	No	No	No
< 65	Black	Male	Adenocarcinoma	T1a	N3	≤3	No	No	No	No
≥ 65	Black	Female	Squamous	T3	N3	≤3	Yes	No	No	No
< 65	White	Female	Adenocarcinoma	T1a	N3	≤3	Yes	Yes	No	No
< 65	White	Female	Adenocarcinoma	T1a	N3	≤3	No	Yes	No	No
< 65	White	Male	Adenocarcinoma	T1a	N3	≤3	No	No	No	No
< 65	White	Male	Adenocarcinoma	T3	N3	≤3	No	No	No	No
< 65	White	Female	Adenocarcinoma	T1a	N3	≤3	No	No	Yes	No
< 65	White	Male	Adenocarcinoma	T1a	N3	≤3	No	No	No	No
< 65	White	Male	Adenocarcinoma	T2a	N3	≤3	Yes	Yes	No	No
< 65	White	Female	Adenocarcinoma	T1a	N3	≤3	Yes	No	No	No
≥ 65	White	Male	Adenocarcinoma	T2a	N3	≤3	No	No	No	Yes
≥ 65	White	Male	Adenocarcinoma	T2a	N3	≤3	Yes	No	No	Yes
≥ 65	White	Male	Adenocarcinoma	T1a	N3	≤3	No	No	No	No
≥ 65	White	Male	Adenocarcinoma	T4	N3	≤3	No	No	No	No
≥ 65	White	Female	Adenocarcinoma	T3	N3	≤3	No	No	No	Yes
≥ 65	White	Male	Adenocarcinoma	T4	N3	≤3	No	No	No	No
≥ 65	White	Male	Adenocarcinoma	T1a	N3	≤3	No	No	No	No
< 65	White	Female	Squamous	T1a	N3	≤3	No	No	No	No
< 65	White	Male	Squamous	T1a	N3	≤3	No	No	No	No
< 65	White	Male	Squamous	T4	N3	≤3	Yes	No	No	No
≥ 65	White	Female	Squamous	T4	N3	≤3	No	No	No	Yes
< 65	Others	Male	Adenocarcinoma	T4	N2	≤3	Yes	No	No	Yes
≥ 65	Others	Female	Adenocarcinoma	T3	N2	≤3	No	No	No	Yes
< 65	Black	Female	Adenocarcinoma	T1a	N2	≤3	Yes	No	No	No
< 65	Black	Female	Squamous	T1a	N2	≤3	Yes	Yes	Yes	No
< 65	White	Male	Adenocarcinoma	T3	N2	≤3	Yes	Yes	No	No
< 65	White	Male	Adenocarcinoma	T2a	N2	≤3	No	No	Yes	No
< 65	White	Male	Adenocarcinoma	T1a	N2	≤3	Yes	No	No	No
< 65	White	Male	Adenocarcinoma	T1a	N2	≤3	No	Yes	No	No
< 65	White	Female	Adenocarcinoma	T4	N2	≤3	No	No	Yes	Yes
< 65	White	Female	Adenocarcinoma	T4	N2	≤3	No	Yes	No	No
< 65	White	Female	Adenocarcinoma	T1a	N2	≤3	No	No	No	No
< 65	White	Female	Adenocarcinoma	T4	N2	≤3	No	No	Yes	No
< 65	White	Female	Adenocarcinoma	T4	N2	≤3	No	Yes	No	No
< 65	White	Female	Adenocarcinoma	T3	N2	≤3	No	Yes	No	No
< 65	White	Male	Adenocarcinoma	T3	N2	≤3	Yes	No	No	No
< 65	White	Male	Adenocarcinoma	T1a	N2	≤3	No	Yes	No	No
< 65	White	Male	Adenocarcinoma	T1a	N2	≤3	Yes	No	No	No
≥ 65	White	Male	Adenocarcinoma	T3	N2	≤3	No	No	No	No
≥ 65	White	Male	Adenocarcinoma	T2a	N2	≤3	No	No	No	Yes
≥ 65	White	Female	Adenocarcinoma	T1a	N2	≤3	Yes	No	No	No
≥ 65	White	Female	Adenocarcinoma	T4	N2	≤3	No	No	No	Yes
≥ 65	White	Male	Adenocarcinoma	T2a	N2	≤3	Yes	No	No	No
≥ 65	White	Male	Adenocarcinoma	T1a	N2	≤3	No	Yes	No	No
≥ 65	White	Female	Adenocarcinoma	T1a	N2	≤3	Yes	Yes	Yes	No
≥ 65	White	Male	Adenocarcinoma	T4	N2	≤3	No	No	No	Yes
≥ 65	White	Male	Adenocarcinoma	T3	N2	≤3	No	No	Yes	No
≥ 65	White	Male	Adenocarcinoma	T3	N2	≤3	Yes	No	No	No
≥ 65	White	Female	Adenocarcinoma	T2a	N2	≤3	No	No	No	No
< 65	White	Male	Squamous	T2a	N2	≤3	Yes	No	No	No
< 65	White	Male	Squamous	T1a	N2	≤3	No	No	Yes	No
≥ 65	White	Female	Squamous	T4	N2	≤3	No	No	No	Yes
≥ 65	White	Female	Squamous	T4	N2	≤3	No	No	No	Yes
≥ 65	White	Female	Squamous	T3	N2	≤3	No	No	No	No
≥ 65	White	Female	Squamous	T1a	N2	≤3	No	No	No	No
< 65	Black	Female	Adenocarcinoma	T3	N1	≤3	No	No	No	Yes
< 65	Black	Male	Adenocarcinoma	T1a	N1	≤3	Yes	No	No	No
≥ 65	Black	Male	Adenocarcinoma	T3	N1	≤3	Yes	No	No	Yes
< 65	White	Female	Adenocarcinoma	T1a	N1	≤3	No	Yes	No	No
< 65	White	Female	Adenocarcinoma	T1a	N1	≤3	No	Yes	No	No
≥ 65	White	Male	Adenocarcinoma	T3	N1	≤3	Yes	No	No	No
≥ 65	White	Female	Adenocarcinoma	T2a	N1	≤3	No	No	No	No
< 65	White	Male	Squamous	T1a	N1	≤3	No	No	Yes	No
≥ 65	White	Male	Squamous	T3	N1	≤3	No	No	No	Yes
≥ 65	White	Male	Squamous	T3	N1	≤3	No	No	No	Yes
< 65	Others	Male	Adenocarcinoma	T2a	N0	≤3	No	Yes	No	No
≥ 65	Others	Female	Adenocarcinoma	T4	N0	≤3	No	Yes	No	No
≥ 65	Others	Female	Adenocarcinoma	T1a	N0	≤3	No	Yes	No	No
≥ 65	Others	Female	Adenocarcinoma	T2a	N0	≤3	Yes	No	No	Yes
< 65	Black	Female	Adenocarcinoma	T1a	N0	≤3	No	No	Yes	No
< 65	Black	Female	Adenocarcinoma	T2a	N0	≤3	No	No	Yes	No
≥ 65	Black	Female	Squamous	T3	N0	≤3	No	No	No	No
≥ 65	White	Female	Adenocarcinoma	T1a	N0	≤3	No	No	No	No
< 65	White	Female	Adenocarcinoma	T1a	N0	≤3	No	Yes	No	Yes
< 65	White	Male	Adenocarcinoma	T4	N0	≤3	No	No	Yes	Yes
< 65	White	Female	Adenocarcinoma	T4	N0	≤3	No	Yes	No	No
< 65	White	Male	Adenocarcinoma	T4	N0	≤3	No	No	Yes	No
< 65	White	Male	Adenocarcinoma	T3	N0	≤3	No	Yes	No	Yes
< 65	White	Female	Adenocarcinoma	T2a	N0	≤3	Yes	No	No	No
< 65	White	Male	Adenocarcinoma	T1a	N0	≤3	No	No	No	No
< 65	White	Male	Adenocarcinoma	T1a	N0	≤3	No	Yes	No	No
≥ 65	White	Male	Adenocarcinoma	T4	N0	≤3	Yes	No	Yes	No
≥ 65	White	Male	Adenocarcinoma	T1a	N0	≤3	No	No	No	No
≥ 65	White	Female	Adenocarcinoma	T1a	N0	≤3	No	No	No	Yes
≥ 65	White	Female	Adenocarcinoma	T1a	N0	≤3	Yes	Yes	No	No
≥ 65	White	Male	Adenocarcinoma	T3	N0	≤3	No	No	No	No
≥ 65	White	Male	Adenocarcinoma	T1a	N0	≤3	Yes	No	No	No
≥ 65	White	Female	Adenocarcinoma	T1a	N0	≤3	Yes	No	Yes	No
≥ 65	White	Male	Adenocarcinoma	T4	N0	≤3	No	No	No	No
≥ 65	White	Female	Adenocarcinoma	T4	N0	≤3	No	No	No	Yes
≥ 65	White	Female	Adenocarcinoma	T4	N0	≤3	Yes	No	No	Yes
≥ 65	White	Male	Adenocarcinoma	T4	N0	≤3	Yes	No	No	Yes
< 65	White	Female	Squamous	T1a	N0	≤3	Yes	No	No	No
≥ 65	White	Female	Squamous	T1a	N0	≤3	No	Yes	No	No
≥ 65	White	Male	Squamous	T4	N0	≤3	Yes	No	No	No
< 65	Others	Female	Adenocarcinoma	T1a	N3	≤3	No	No	No	No
≥ 65	Others	Male	Adenocarcinoma	T3	N3	≤3	No	No	No	No
≥ 65	Black	Female	Adenocarcinoma	T4	N3	≤3	Yes	No	No	Yes
< 65	White	Female	Adenocarcinoma	T3	N3	≤3	No	No	No	Yes
< 65	White	Female	Adenocarcinoma	T4	N3	≤3	No	Yes	No	No
< 65	White	Male	Adenocarcinoma	T4	N3	≤3	No	No	No	No
< 65	White	Male	Adenocarcinoma	T3	N3	≤3	No	No	No	No
≥ 65	White	Female	Adenocarcinoma	T3	N3	≤3	No	Yes	No	No
≥ 65	White	Female	Adenocarcinoma	T3	N3	≤3	No	Yes	No	Yes
≥ 65	White	Female	Adenocarcinoma	T1a	N3	≤3	Yes	Yes	No	No
≥ 65	White	Male	Adenocarcinoma	T3	N3	≤3	Yes	No	No	Yes
≥ 65	White	Male	Adenocarcinoma	T1a	N3	≤3	No	Yes	No	No
≥ 65	White	Male	Adenocarcinoma	T1a	N3	≤3	No	No	No	No
≥ 65	White	Female	Adenocarcinoma	T1a	N3	≤3	Yes	No	No	No
≥ 65	White	Female	Adenocarcinoma	T1a	N3	≤3	No	Yes	No	No
≥ 65	White	Female	Adenocarcinoma	T1a	N3	≤3	Yes	Yes	No	Yes
≥ 65	White	Male	Squamous	T4	N3	≤3	No	No	No	Yes
≥ 65	White	Male	Squamous	T2a	N3	≤3	Yes	No	No	No
< 65	Others	Female	Adenocarcinoma	T3	N2	≤3	Yes	Yes	Yes	No
< 65	Others	Male	Adenocarcinoma	T4	N2	≤3	Yes	No	No	Yes
≥ 65	Others	Male	Adenocarcinoma	T4	N2	≤3	No	No	Yes	Yes
≥ 65	Others	Male	Adenocarcinoma	T4	N2	≤3	Yes	Yes	No	Yes
< 65	Black	Male	Adenocarcinoma	T3	N2	≤3	No	No	No	No
< 65	Black	Male	Adenocarcinoma	T3	N2	≤3	No	No	Yes	No
< 65	Black	Female	Adenocarcinoma	T1a	N2	≤3	No	Yes	No	No
< 65	Black	Male	Adenocarcinoma	T4	N2	≤3	No	No	No	No
≥ 65	Black	Male	Adenocarcinoma	T2a	N2	≤3	No	No	No	No
≥ 65	Black	Female	Adenocarcinoma	T1a	N2	≤3	Yes	No	No	No
< 65	Black	Female	Squamous	T4	N2	≤3	Yes	No	Yes	No
< 65	White	Male	Adenocarcinoma	T1a	N2	≤3	No	Yes	No	No
< 65	White	Male	Adenocarcinoma	T1a	N2	≤3	No	Yes	No	No
< 65	White	Male	Adenocarcinoma	T3	N2	≤3	Yes	No	No	Yes
< 65	White	Male	Adenocarcinoma	T1a	N2	≤3	Yes	No	No	No
< 65	White	Male	Adenocarcinoma	T3	N2	≤3	No	Yes	No	No
< 65	White	Female	Adenocarcinoma	T3	N2	≤3	Yes	Yes	Yes	No
< 65	White	Male	Adenocarcinoma	T1a	N2	≤3	No	No	No	No
< 65	White	Male	Adenocarcinoma	T1a	N2	≤3	No	Yes	No	No
< 65	White	Male	Adenocarcinoma	T1a	N2	≤3	Yes	No	No	Yes
< 65	White	Male	Adenocarcinoma	T4	N2	≤3	No	No	No	No
< 65	White	Female	Adenocarcinoma	T4	N2	≤3	No	No	No	No
< 65	White	Male	Adenocarcinoma	T4	N2	≤3	No	No	No	No
< 65	White	Male	Adenocarcinoma	T4	N2	≤3	No	No	No	Yes
< 65	White	Female	Adenocarcinoma	T4	N2	≤3	Yes	No	No	Yes
< 65	White	Female	Adenocarcinoma	T4	N2	≤3	Yes	No	Yes	Yes
< 65	White	Male	Adenocarcinoma	T3	N2	≤3	No	No	No	No
< 65	White	Female	Adenocarcinoma	T1a	N2	≤3	Yes	No	No	Yes
≥ 65	White	Female	Adenocarcinoma	T4	N2	≤3	No	No	Yes	Yes
≥ 65	White	Male	Adenocarcinoma	T4	N2	≤3	Yes	No	Yes	Yes
≥ 65	White	Female	Adenocarcinoma	T3	N2	≤3	No	No	Yes	No
≥ 65	White	Female	Adenocarcinoma	T1a	N2	≤3	Yes	No	Yes	No
≥ 65	White	Female	Adenocarcinoma	T4	N2	≤3	Yes	Yes	Yes	Yes
≥ 65	White	Female	Adenocarcinoma	T2a	N2	≤3	Yes	No	Yes	No
≥ 65	White	Female	Adenocarcinoma	T1a	N2	≤3	No	Yes	No	No
≥ 65	White	Female	Adenocarcinoma	T4	N2	≤3	Yes	No	Yes	No
≥ 65	White	Male	Adenocarcinoma	T3	N2	≤3	No	No	Yes	No
≥ 65	White	Female	Adenocarcinoma	T1a	N2	≤3	No	No	No	No
≥ 65	White	Male	Adenocarcinoma	T1a	N2	≤3	No	No	No	No
≥ 65	White	Female	Adenocarcinoma	T1a	N2	≤3	No	Yes	No	No
≥ 65	White	Male	Adenocarcinoma	T1a	N2	≤3	Yes	No	No	No
≥ 65	White	Male	Adenocarcinoma	T2a	N2	≤3	No	No	No	No
≥ 65	White	Female	Adenocarcinoma	T1a	N2	≤3	No	No	No	Yes
≥ 65	White	Female	Squamous	T1a	N2	≤3	No	No	No	No
≥ 65	White	Male	Squamous	T2a	N2	≤3	No	Yes	No	No
≥ 65	Black	Male	Adenocarcinoma	T1a	N1	≤3	No	Yes	No	No
≥ 65	Black	Female	Adenocarcinoma	T1a	N1	≤3	Yes	No	No	No
< 65	White	Female	Adenocarcinoma	T4	N1	≤3	No	Yes	No	No
< 65	White	Female	Adenocarcinoma	T4	N1	≤3	Yes	No	No	Yes
< 65	White	Female	Adenocarcinoma	T1a	N1	≤3	No	No	No	No
< 65	White	Male	Adenocarcinoma	T4	N1	≤3	Yes	No	Yes	Yes
≥ 65	White	Female	Adenocarcinoma	T1a	N1	≤3	No	No	No	Yes
< 65	White	Female	Squamous	T1a	N1	≤3	No	Yes	No	No
< 65	Others	Female	Adenocarcinoma	T2a	N0	≤3	No	No	No	No
< 65	Others	Female	Adenocarcinoma	T1a	N0	≤3	No	Yes	No	No
≥ 65	Others	Male	Adenocarcinoma	T4	N0	≤3	No	No	No	Yes
≥ 65	Others	Female	Adenocarcinoma	T1a	N0	≤3	No	No	No	No
< 65	Black	Female	Adenocarcinoma	T1a	N0	≤3	No	No	No	No
< 65	Black	Male	Adenocarcinoma	T1a	N0	≤3	No	Yes	No	No
< 65	Black	Male	Adenocarcinoma	T1a	N0	≤3	Yes	No	No	No
≥ 65	Black	Female	Adenocarcinoma	T3	N0	≤3	No	No	Yes	Yes
≥ 65	Black	Female	Adenocarcinoma	T3	N0	≤3	Yes	No	No	Yes
< 65	White	Female	Adenocarcinoma	T3	N0	≤3	No	No	No	Yes
< 65	White	Female	Adenocarcinoma	T1a	N0	≤3	No	Yes	No	No
< 65	White	Female	Adenocarcinoma	T1a	N0	≤3	Yes	No	No	No
< 65	White	Female	Adenocarcinoma	T3	N0	≤3	No	No	No	Yes
< 65	White	Female	Adenocarcinoma	T1NOS	N0	≤3	No	Yes	No	No
< 65	White	Male	Adenocarcinoma	T1a	N0	≤3	No	No	No	Yes
≥ 65	White	Male	Adenocarcinoma	T1a	N0	≤3	No	No	No	No
≥ 65	White	Male	Adenocarcinoma	T1a	N0	≤3	Yes	No	Yes	Yes
≥ 65	White	Male	Adenocarcinoma	T4	N0	≤3	No	No	No	Yes
≥ 65	White	Female	Adenocarcinoma	T3	N0	≤3	No	No	No	No
≥ 65	White	Female	Adenocarcinoma	T3	N0	≤3	No	No	No	No
≥ 65	White	Female	Adenocarcinoma	T3	N0	≤3	No	Yes	No	Yes
≥ 65	White	Female	Adenocarcinoma	T2a	N0	≤3	Yes	Yes	No	No
≥ 65	White	Female	Adenocarcinoma	T1a	N0	≤3	Yes	No	No	No
≥ 65	White	Female	Adenocarcinoma	T2a	N0	≤3	No	Yes	No	No
≥ 65	White	Female	Adenocarcinoma	T1a	N0	≤3	No	No	No	No
≥ 65	White	Female	Adenocarcinoma	T1a	N0	≤3	No	Yes	No	No
≥ 65	White	Female	Adenocarcinoma	T4	N0	≤3	No	No	No	No
≥ 65	White	Female	Adenocarcinoma	T3	N0	≤3	No	No	No	No
≥ 65	White	Female	Adenocarcinoma	T1a	N0	≤3	No	No	Yes	No
≥ 65	White	Male	Adenocarcinoma	T4	N0	≤3	No	No	No	Yes
≥ 65	White	Male	Adenocarcinoma	T1a	N0	≤3	Yes	No	No	No
≥ 65	White	Male	Squamous	T3	N0	≤3	No	No	No	Yes
≥ 65	White	Male	Squamous	T1a	N0	≤3	Yes	No	No	No
< 65	Others	Female	Adenocarcinoma	T4	N3	≤3	Yes	No	No	Yes
< 65	Others	Male	Adenocarcinoma	T4	N3	≤3	Yes	No	No	Yes
< 65	Others	Male	Adenocarcinoma	T3	N3	≤3	No	No	Yes	Yes
≥ 65	Others	Male	Adenocarcinoma	T3	N3	≤3	Yes	No	Yes	Yes
< 65	Black	Female	Adenocarcinoma	T1a	N3	≤3	No	Yes	No	No
< 65	Black	Male	Adenocarcinoma	T4	N3	≤3	No	No	No	Yes
≥ 65	Black	Male	Adenocarcinoma	T4	N3	≤3	No	No	No	Yes
≥ 65	Black	Male	Adenocarcinoma	T4	N3	≤3	No	Yes	No	No
≥ 65	Black	Female	Adenocarcinoma	T4	N3	≤3	Yes	No	Yes	No
≥ 65	Black	Male	Adenocarcinoma	T4	N3	≤3	Yes	Yes	Yes	Yes
< 65	Black	Female	Squamous	T1a	N3	≤3	No	No	Yes	Yes
≥ 65	Black	Male	Squamous	T4	N3	≤3	Yes	Yes	No	Yes
< 65	White	Male	Adenocarcinoma	T3	N3	≤3	Yes	No	Yes	Yes
< 65	White	Female	Adenocarcinoma	T2a	N3	≤3	No	No	No	No
< 65	White	Female	Adenocarcinoma	T1a	N3	≤3	No	No	No	Yes
< 65	White	Female	Adenocarcinoma	T1a	N3	≤3	No	Yes	No	No
< 65	White	Male	Adenocarcinoma	T4	N3	≤3	No	Yes	No	Yes
< 65	White	Male	Adenocarcinoma	T4	N3	≤3	Yes	No	No	Yes
< 65	White	Female	Adenocarcinoma	T4	N3	≤3	Yes	Yes	No	No
< 65	White	Female	Adenocarcinoma	T4	N3	≤3	Yes	Yes	Yes	Yes
< 65	White	Male	Adenocarcinoma	T3	N3	≤3	No	No	No	No
< 65	White	Male	Adenocarcinoma	T3	N3	≤3	Yes	Yes	No	Yes
< 65	White	Male	Adenocarcinoma	T1a	N3	≤3	No	No	No	No
< 65	White	Male	Adenocarcinoma	T1a	N3	≤3	Yes	No	No	Yes
< 65	White	Male	Adenocarcinoma	T4	N3	≤3	No	Yes	Yes	Yes
< 65	White	Male	Adenocarcinoma	T4	N3	≤3	Yes	No	No	No
< 65	White	Male	Adenocarcinoma	T4	N3	≤3	Yes	No	Yes	Yes
< 65	White	Female	Adenocarcinoma	T3	N3	≤3	No	Yes	Yes	No
≥ 65	White	Male	Adenocarcinoma	T4	N3	≤3	No	No	No	No
≥ 65	White	Female	Adenocarcinoma	T1a	N3	≤3	No	Yes	No	No
≥ 65	White	Female	Adenocarcinoma	T1a	N3	≤3	Yes	No	No	No
≥ 65	White	Female	Adenocarcinoma	T1a	N3	≤3	Yes	Yes	No	No
≥ 65	White	Female	Adenocarcinoma	T4	N3	≤3	No	No	No	No
≥ 65	White	Male	Adenocarcinoma	T4	N3	≤3	No	No	No	Yes
≥ 65	White	Male	Adenocarcinoma	T4	N3	≤3	Yes	No	No	No
≥ 65	White	Female	Adenocarcinoma	T4	N3	≤3	Yes	No	Yes	Yes
≥ 65	White	Male	Adenocarcinoma	T2a	N3	≤3	No	No	No	No
≥ 65	White	Male	Adenocarcinoma	T1a	N3	≤3	Yes	No	No	No
≥ 65	White	Male	Adenocarcinoma	T4	N3	≤3	Yes	Yes	No	Yes
≥ 65	White	Male	Adenocarcinoma	T1a	N3	≤3	Yes	No	No	No
≥ 65	White	Male	Adenocarcinoma	T1a	N3	≤3	No	No	No	No
< 65	White	Male	Squamous	T4	N3	≤3	No	No	No	No
< 65	White	Female	Squamous	T4	N3	≤3	No	Yes	No	No
< 65	White	Female	Squamous	T2a	N3	≤3	No	No	No	No
≥ 65	White	Male	Squamous	T4	N3	≤3	No	No	No	No
≥ 65	White	Female	Squamous	T1a	N3	≤3	No	No	No	No
≥ 65	White	Male	Squamous	T4	N3	≤3	No	No	No	No
< 65	Others	Female	Adenocarcinoma	T4	N2	≤3	No	Yes	No	No
< 65	Others	Male	Adenocarcinoma	T1a	N2	≤3	Yes	No	Yes	No
< 65	Others	Male	Adenocarcinoma	T3	N2	≤3	No	Yes	No	No
≥ 65	Others	Male	Adenocarcinoma	T4	N2	≤3	No	No	No	Yes
≥ 65	Others	Male	Adenocarcinoma	T3	N2	≤3	No	No	No	Yes
≥ 65	Others	Female	Adenocarcinoma	T3	N2	≤3	No	No	No	Yes
≥ 65	Others	Male	Adenocarcinoma	T1a	N2	≤3	Yes	Yes	No	No
≥ 65	Others	Male	Adenocarcinoma	T3	N2	≤3	Yes	No	Yes	Yes
< 65	Black	Female	Adenocarcinoma	T4	N2	≤3	No	No	No	Yes
< 65	Black	Female	Adenocarcinoma	T4	N2	≤3	No	Yes	No	No
< 65	Black	Male	Adenocarcinoma	T1a	N2	≤3	Yes	No	No	No
< 65	Black	Female	Adenocarcinoma	T3	N2	≤3	No	Yes	No	No
< 65	Black	Female	Adenocarcinoma	T3	N2	≤3	Yes	No	No	Yes
< 65	Black	Female	Adenocarcinoma	T1a	N2	≤3	No	Yes	Yes	No
< 65	Black	Male	Adenocarcinoma	T1a	N2	≤3	Yes	No	No	No
< 65	Black	Female	Adenocarcinoma	T3	N2	≤3	No	No	No	No
< 65	Black	Female	Adenocarcinoma	T1a	N2	≤3	No	Yes	No	No
≥ 65	Black	Female	Adenocarcinoma	T4	N2	≤3	No	No	No	No
≥ 65	Black	Male	Adenocarcinoma	T4	N2	≤3	No	No	No	Yes
≥ 65	Black	Female	Adenocarcinoma	T4	N2	≤3	No	No	Yes	Yes
≥ 65	Black	Female	Adenocarcinoma	T2a	N2	≤3	No	No	No	Yes
< 65	Black	Female	Squamous	T1a	N2	≤3	No	No	Yes	Yes
< 65	Black	Female	Squamous	T1a	N2	≤3	No	Yes	No	No
≥ 65	Black	Male	Squamous	T3	N2	≤3	Yes	No	No	No
< 65	White	Female	Adenocarcinoma	T1a	N2	≤3	Yes	No	No	No
< 65	White	Female	Adenocarcinoma	T4	N2	≤3	No	Yes	No	No
< 65	White	Male	Adenocarcinoma	T3	N2	≤3	No	Yes	No	Yes
< 65	White	Male	Adenocarcinoma	T4	N2	≤3	Yes	No	No	No
< 65	White	Female	Adenocarcinoma	T4	N2	≤3	Yes	No	Yes	Yes
< 65	White	Female	Adenocarcinoma	T3	N2	≤3	No	No	No	No
< 65	White	Female	Adenocarcinoma	T3	N2	≤3	No	Yes	No	No
< 65	White	Male	Adenocarcinoma	T2a	N2	≤3	No	Yes	No	No
< 65	White	Female	Adenocarcinoma	T4	N2	≤3	No	No	No	No
< 65	White	Female	Adenocarcinoma	T3	N2	≤3	No	Yes	No	No
< 65	White	Female	Adenocarcinoma	T3	N2	≤3	Yes	No	Yes	Yes
< 65	White	Female	Adenocarcinoma	T2a	N2	≤3	Yes	No	No	No
< 65	White	Female	Adenocarcinoma	T1a	N2	≤3	No	Yes	No	No
< 65	White	Male	Adenocarcinoma	T4	N2	≤3	No	No	No	No
< 65	White	Male	Adenocarcinoma	T4	N2	≤3	No	No	No	No
< 65	White	Female	Adenocarcinoma	T4	N2	≤3	No	No	No	No
< 65	White	Female	Adenocarcinoma	T4	N2	≤3	No	No	No	Yes
< 65	White	Male	Adenocarcinoma	T4	N2	≤3	No	Yes	No	Yes
< 65	White	Male	Adenocarcinoma	T4	N2	≤3	Yes	No	Yes	Yes
< 65	White	Male	Adenocarcinoma	T4	N2	≤3	Yes	Yes	Yes	No
< 65	White	Male	Adenocarcinoma	T3	N2	≤3	No	No	No	No
< 65	White	Female	Adenocarcinoma	T3	N2	≤3	No	No	No	No
< 65	White	Female	Adenocarcinoma	T3	N2	≤3	No	No	Yes	No
< 65	White	Female	Adenocarcinoma	T2a	N2	≤3	No	No	No	No
< 65	White	Male	Adenocarcinoma	T1a	N2	≤3	No	No	No	No
< 65	White	Male	Adenocarcinoma	T1a	N2	≤3	No	No	No	No
< 65	White	Female	Adenocarcinoma	T1a	N2	≤3	No	No	Yes	No
< 65	White	Male	Adenocarcinoma	T1a	N2	≤3	No	Yes	No	Yes
< 65	White	Male	Adenocarcinoma	T1a	N2	≤3	Yes	Yes	No	No
≥ 65	White	Male	Adenocarcinoma	T4	N2	≤3	Yes	No	No	No
≥ 65	White	Female	Adenocarcinoma	T4	N2	≤3	Yes	No	Yes	Yes
≥ 65	White	Female	Adenocarcinoma	T3	N2	≤3	Yes	Yes	No	Yes
≥ 65	White	Male	Adenocarcinoma	T2a	N2	≤3	No	No	No	Yes
≥ 65	White	Male	Adenocarcinoma	T2a	N2	≤3	Yes	No	No	No
≥ 65	White	Male	Adenocarcinoma	T1a	N2	≤3	No	No	No	No
≥ 65	White	Female	Adenocarcinoma	T1a	N2	≤3	No	No	Yes	No
≥ 65	White	Female	Adenocarcinoma	T4	N2	≤3	No	Yes	No	No
≥ 65	White	Male	Adenocarcinoma	T4	N2	≤3	No	Yes	No	No
≥ 65	White	Male	Adenocarcinoma	T3	N2	≤3	No	No	No	No
≥ 65	White	Female	Adenocarcinoma	T3	N2	≤3	No	No	No	Yes
≥ 65	White	Female	Adenocarcinoma	T3	N2	≤3	No	Yes	No	No
≥ 65	White	Male	Adenocarcinoma	T3	N2	≤3	Yes	No	No	Yes
≥ 65	White	Male	Adenocarcinoma	T3	N2	≤3	Yes	No	Yes	Yes
≥ 65	White	Male	Adenocarcinoma	T2a	N2	≤3	No	No	No	No
≥ 65	White	Female	Adenocarcinoma	T2a	N2	≤3	No	No	No	No
≥ 65	White	Male	Adenocarcinoma	T2a	N2	≤3	No	No	No	No
≥ 65	White	Female	Adenocarcinoma	T2a	N2	≤3	No	No	No	Yes
≥ 65	White	Male	Adenocarcinoma	T1a	N2	≤3	No	No	No	No
≥ 65	White	Male	Adenocarcinoma	T1a	N2	≤3	No	Yes	No	No
≥ 65	White	Male	Adenocarcinoma	T1a	N2	≤3	Yes	No	No	No
≥ 65	White	Female	Adenocarcinoma	T1a	N2	≤3	Yes	No	No	No
≥ 65	White	Male	Adenocarcinoma	T1a	N2	≤3	Yes	No	No	No
≥ 65	White	Male	Adenocarcinoma	T1a	N2	≤3	Yes	No	No	No
≥ 65	White	Male	Adenocarcinoma	T1a	N2	≤3	Yes	No	Yes	No
≥ 65	White	Male	Adenocarcinoma	T1a	N2	≤3	Yes	No	Yes	No
≥ 65	White	Female	Adenocarcinoma	T1a	N2	≤3	Yes	Yes	Yes	No
≥ 65	White	Male	Adenocarcinoma	T4	N2	≤3	No	No	No	Yes
≥ 65	White	Male	Adenocarcinoma	T3	N2	≤3	No	No	No	Yes
≥ 65	White	Male	Adenocarcinoma	T1a	N2	≤3	No	No	No	No
≥ 65	White	Female	Adenocarcinoma	T1a	N2	≤3	No	No	No	No
≥ 65	White	Male	Adenocarcinoma	T4	N2	≤3	No	Yes	No	Yes
≥ 65	White	Male	Adenocarcinoma	T4	N2	≤3	Yes	No	No	Yes
≥ 65	White	Male	Adenocarcinoma	T3	N2	≤3	No	No	No	Yes
≥ 65	White	Male	Adenocarcinoma	T3	N2	≤3	Yes	No	No	No
≥ 65	White	Male	Adenocarcinoma	T3	N2	≤3	Yes	No	Yes	Yes
≥ 65	White	Female	Adenocarcinoma	T2a	N2	≤3	No	No	Yes	Yes
≥ 65	White	Male	Adenocarcinoma	T1a	N2	≤3	No	No	No	No
≥ 65	White	Female	Adenocarcinoma	T1a	N2	≤3	No	No	No	Yes
≥ 65	White	Male	Adenocarcinoma	T2a	N2	≤3	No	No	No	No
≥ 65	White	Male	Adenocarcinoma	T2a	N2	≤3	No	No	No	No
≥ 65	White	Male	Squamous	T1a	N2	≤3	Yes	Yes	No	No
≥ 65	White	Male	Squamous	T4	N2	≤3	No	No	No	Yes
< 65	White	Male	Squamous	T4	N2	≤3	No	No	No	No
< 65	White	Female	Squamous	T1a	N2	≤3	No	Yes	No	No
< 65	White	Male	Squamous	T3	N2	≤3	No	No	No	Yes
< 65	White	Male	Squamous	T2a	N2	≤3	No	No	No	No
< 65	White	Male	Squamous	T4	N2	≤3	No	No	No	No
< 65	White	Male	Squamous	T1a	N2	≤3	No	Yes	No	No
≥ 65	White	Female	Squamous	T4	N2	≤3	Yes	No	No	Yes
≥ 65	White	Male	Squamous	T3	N2	≤3	No	No	No	Yes
≥ 65	White	Female	Squamous	T3	N2	≤3	Yes	No	No	Yes
≥ 65	White	Female	Squamous	T1a	N2	≤3	No	Yes	No	No
≥ 65	White	Female	Squamous	T4	N2	≤3	No	Yes	No	Yes
≥ 65	White	Male	Squamous	T4	N2	≤3	Yes	Yes	Yes	Yes
≥ 65	White	Female	Squamous	T3	N2	≤3	No	No	No	No
≥ 65	White	Female	Squamous	T1a	N2	≤3	No	Yes	No	No
≥ 65	White	Male	Squamous	T4	N2	≤3	Yes	No	No	No
≥ 65	White	Male	Squamous	T1a	N2	≤3	Yes	No	No	No
≥ 65	White	Male	Squamous	T4	N2	≤3	Yes	No	No	Yes
≥ 65	White	Male	Squamous	T4	N2	≤3	Yes	No	Yes	Yes
≥ 65	Black	Female	Adenocarcinoma	T1a	N1	≤3	No	No	Yes	No
< 65	White	Female	Adenocarcinoma	T1a	N1	≤3	No	No	No	No
< 65	White	Male	Adenocarcinoma	T3	N1	≤3	No	Yes	No	No
< 65	White	Female	Adenocarcinoma	T1a	N1	≤3	No	No	No	No
< 65	White	Male	Adenocarcinoma	T3	N1	≤3	No	Yes	No	Yes
< 65	White	Male	Adenocarcinoma	T1a	N1	≤3	No	Yes	No	Yes
≥ 65	White	Female	Adenocarcinoma	T4	N1	≤3	No	No	No	No
≥ 65	White	Female	Adenocarcinoma	T1a	N1	≤3	No	Yes	No	No
≥ 65	White	Female	Adenocarcinoma	T1a	N1	≤3	Yes	No	No	No
≥ 65	White	Male	Adenocarcinoma	T1a	N1	≤3	Yes	Yes	No	No
≥ 65	White	Female	Adenocarcinoma	T4	N1	≤3	No	No	No	No
< 65	White	Male	Squamous	T3	N1	≤3	No	Yes	No	No
< 65	White	Female	Squamous	T1a	N1	≤3	Yes	No	No	No
≥ 65	White	Female	Squamous	T4	N1	≤3	No	No	No	Yes
≥ 65	White	Male	Squamous	T4	N1	≤3	No	No	No	No
≥ 65	White	Male	Squamous	T4	N1	≤3	No	No	No	Yes
≥ 65	White	Male	Squamous	T1a	N1	≤3	No	No	No	Yes
≥ 65	White	Female	Squamous	T1a	N1	≤3	No	Yes	No	No
≥ 65	White	Male	Squamous	T1a	N1	≤3	Yes	No	No	No
≥ 65	White	Male	Squamous	T1a	N1	≤3	No	No	No	No
≥ 65	White	Male	Squamous	T4	N1	≤3	Yes	No	Yes	Yes
< 65	Others	Male	Adenocarcinoma	T2a	N0	≤3	Yes	Yes	No	Yes
< 65	Others	Female	Adenocarcinoma	T1a	N0	≤3	No	Yes	No	No
< 65	Others	Female	Adenocarcinoma	T1a	N0	≤3	No	Yes	No	No
≥ 65	Others	Male	Adenocarcinoma	T3	N0	≤3	Yes	No	Yes	Yes
≥ 65	Others	Female	Adenocarcinoma	T1a	N0	≤3	Yes	No	No	No
≥ 65	Others	Male	Adenocarcinoma	T4	N0	≤3	No	No	No	No
≥ 65	Others	Female	Adenocarcinoma	T3	N0	≤3	No	No	No	No
< 65	Black	Female	Adenocarcinoma	T2a	N0	≤3	Yes	Yes	Yes	No
< 65	Black	Male	Adenocarcinoma	T2a	N0	≤3	Yes	No	No	No
< 65	Black	Male	Adenocarcinoma	T2a	N0	≤3	No	Yes	No	No
< 65	Black	Male	Adenocarcinoma	T2a	N0	≤3	Yes	No	No	No
< 65	Black	Male	Adenocarcinoma	T1a	N0	≤3	No	No	No	No
≥ 65	Black	Female	Adenocarcinoma	T1a	N0	≤3	No	No	No	No
≥ 65	Black	Female	Adenocarcinoma	T1a	N0	≤3	No	Yes	No	No
≥ 65	Black	Female	Adenocarcinoma	T1a	N0	≤3	No	Yes	No	No
≥ 65	Black	Female	Adenocarcinoma	T1a	N0	≤3	No	No	No	Yes
≥ 65	Black	Female	Adenocarcinoma	T1a	N0	≤3	Yes	No	Yes	No
≥ 65	Black	Male	Adenocarcinoma	T3	N0	≤3	No	No	No	Yes
≥ 65	Black	Female	Adenocarcinoma	T3	N0	≤3	No	No	Yes	Yes
< 65	Black	Male	Squamous	T3	N0	≤3	No	No	No	No
≥ 65	Black	Female	Squamous	T2a	N0	≤3	No	No	No	No
≥ 65	Black	Female	Squamous	T4	N0	≤3	No	No	No	No
< 65	White	Female	Adenocarcinoma	T4	N0	≤3	Yes	No	Yes	No
< 65	White	Female	Adenocarcinoma	T2a	N0	≤3	No	Yes	No	No
< 65	White	Female	Adenocarcinoma	T4	N0	≤3	No	No	No	Yes
< 65	White	Male	Adenocarcinoma	T1a	N0	≤3	No	Yes	No	No
< 65	White	Female	Adenocarcinoma	T3	N0	≤3	No	Yes	No	Yes
< 65	White	Female	Adenocarcinoma	T3	N0	≤3	No	Yes	No	Yes
< 65	White	Male	Adenocarcinoma	T2a	N0	≤3	No	No	No	No
< 65	White	Female	Adenocarcinoma	T1a	N0	≤3	Yes	No	No	No
< 65	White	Male	Adenocarcinoma	T1a	N0	≤3	Yes	No	No	No
< 65	White	Male	Adenocarcinoma	T4	N0	≤3	Yes	No	No	No
< 65	White	Female	Adenocarcinoma	T3	N0	≤3	Yes	Yes	Yes	No
< 65	White	Female	Adenocarcinoma	T2a	N0	≤3	No	No	No	No
< 65	White	Male	Adenocarcinoma	T1a	N0	≤3	No	No	No	No
< 65	White	Male	Adenocarcinoma	T1a	N0	≤3	No	Yes	No	No
< 65	White	Female	Adenocarcinoma	T1a	N0	≤3	Yes	No	No	No
< 65	White	Female	Adenocarcinoma	T1a	N0	≤3	Yes	Yes	No	No
< 65	White	Male	Adenocarcinoma	T4	N0	≤3	No	No	No	No
< 65	White	Male	Adenocarcinoma	T4	N0	≤3	No	No	No	No
< 65	White	Male	Adenocarcinoma	T3	N0	≤3	Yes	No	No	No
< 65	White	Female	Adenocarcinoma	T2a	N0	≤3	No	No	No	No
< 65	White	Male	Adenocarcinoma	T2a	N0	≤3	No	No	No	No
< 65	White	Female	Adenocarcinoma	T1a	N0	≤3	Yes	No	No	No
< 65	White	Female	Adenocarcinoma	T1a	N0	≤3	Yes	No	No	No
< 65	White	Male	Adenocarcinoma	T1a	N0	≤3	Yes	No	No	Yes
≥ 65	White	Male	Adenocarcinoma	T3	N0	≤3	No	No	No	No
≥ 65	White	Female	Adenocarcinoma	T3	N0	≤3	Yes	No	No	Yes
≥ 65	White	Male	Adenocarcinoma	T3	N0	≤3	Yes	No	No	Yes
≥ 65	White	Male	Adenocarcinoma	T2a	N0	≤3	No	No	No	No
≥ 65	White	Male	Adenocarcinoma	T1a	N0	≤3	Yes	No	No	No
≥ 65	White	Male	Adenocarcinoma	T4	N0	≤3	No	No	No	Yes
≥ 65	White	Female	Adenocarcinoma	T4	N0	≤3	No	No	Yes	No
≥ 65	White	Female	Adenocarcinoma	T3	N0	≤3	No	No	No	No
≥ 65	White	Male	Adenocarcinoma	T3	N0	≤3	No	No	No	No
≥ 65	White	Female	Adenocarcinoma	T3	N0	≤3	Yes	No	No	Yes
≥ 65	White	Male	Adenocarcinoma	T2a	N0	≤3	No	Yes	No	No
≥ 65	White	Female	Adenocarcinoma	T1a	N0	≤3	No	No	No	No
≥ 65	White	Female	Adenocarcinoma	T1a	N0	≤3	No	No	No	No
≥ 65	White	Female	Adenocarcinoma	T1a	N0	≤3	No	Yes	No	No
≥ 65	White	Female	Adenocarcinoma	T1a	N0	≤3	No	Yes	Yes	No
≥ 65	White	Female	Adenocarcinoma	T1a	N0	≤3	Yes	No	No	No
≥ 65	White	Male	Adenocarcinoma	T1a	N0	≤3	Yes	No	No	No
≥ 65	White	Male	Adenocarcinoma	T1a	N0	≤3	Yes	No	No	No
≥ 65	White	Female	Adenocarcinoma	T3	N0	≤3	No	No	No	No
≥ 65	White	Female	Adenocarcinoma	T2a	N0	≤3	No	No	No	No
≥ 65	White	Female	Adenocarcinoma	T1a	N0	≤3	No	Yes	No	No
≥ 65	White	Male	Adenocarcinoma	T1a	N0	≤3	Yes	No	No	No
≥ 65	White	Male	Adenocarcinoma	T4	N0	≤3	No	No	No	Yes
≥ 65	White	Female	Adenocarcinoma	T4	N0	≤3	No	No	No	Yes
≥ 65	White	Male	Adenocarcinoma	T4	N0	≤3	Yes	No	Yes	No
≥ 65	White	Female	Adenocarcinoma	T3	N0	≤3	No	No	No	No
≥ 65	White	Male	Adenocarcinoma	T1a	N0	≤3	No	Yes	No	No
≥ 65	White	Female	Adenocarcinoma	T4	N0	≤3	No	No	No	Yes
≥ 65	White	Female	Adenocarcinoma	T4	N0	≤3	No	No	Yes	No
≥ 65	White	Female	Adenocarcinoma	T2a	N0	≤3	No	No	No	No
≥ 65	White	Female	Squamous	T3	N0	≤3	No	No	No	Yes
< 65	White	Male	Squamous	T4	N0	≤3	Yes	Yes	No	Yes
≥ 65	White	Female	Squamous	T2a	N0	≤3	No	No	No	No
≥ 65	White	Male	Squamous	T1a	N0	≤3	No	No	No	No
≥ 65	White	Male	Squamous	T1a	N0	≤3	Yes	No	No	No
≥ 65	White	Female	Squamous	T3	N0	≤3	No	No	No	Yes
≥ 65	White	Female	Squamous	T1a	N0	≤3	Yes	No	No	No
< 65	Others	Male	Adenocarcinoma	T1a	N3	≤3	No	Yes	No	No
< 65	Others	Male	Adenocarcinoma	T1a	N3	≤3	No	No	No	No
≥ 65	Others	Male	Adenocarcinoma	T4	N3	≤3	No	Yes	No	Yes
≥ 65	Others	Male	Adenocarcinoma	T4	N3	≤3	Yes	No	No	Yes
< 65	Black	Female	Adenocarcinoma	T1a	N3	≤3	No	Yes	No	No
≥ 65	Black	Male	Adenocarcinoma	T4	N3	≤3	No	No	No	No
≥ 65	Black	Female	Adenocarcinoma	T2a	N3	≤3	No	No	No	Yes
< 65	White	Female	Adenocarcinoma	T4	N3	≤3	No	Yes	Yes	No
< 65	White	Female	Adenocarcinoma	T3	N3	≤3	No	No	No	Yes
< 65	White	Female	Adenocarcinoma	T3	N3	≤3	Yes	No	No	No
< 65	White	Female	Adenocarcinoma	T1a	N3	≤3	No	No	No	No
< 65	White	Female	Adenocarcinoma	T4	N3	≤3	No	No	No	No
< 65	White	Female	Adenocarcinoma	T4	N3	≤3	No	No	No	No
< 65	White	Male	Adenocarcinoma	T3	N3	≤3	No	No	No	Yes
< 65	White	Male	Adenocarcinoma	T3	N3	≤3	Yes	No	No	Yes
< 65	White	Female	Adenocarcinoma	T2a	N3	≤3	No	No	No	No
< 65	White	Female	Adenocarcinoma	T1a	N3	≤3	No	No	No	No
< 65	White	Female	Adenocarcinoma	T1a	N3	≤3	No	Yes	No	No
< 65	White	Female	Adenocarcinoma	T4	N3	≤3	No	No	No	Yes
< 65	White	Male	Adenocarcinoma	T4	N3	≤3	No	No	Yes	Yes
< 65	White	Male	Adenocarcinoma	T4	N3	≤3	No	Yes	No	No
< 65	White	Female	Adenocarcinoma	T4	N3	≤3	No	Yes	No	No
< 65	White	Female	Adenocarcinoma	T4	N3	≤3	No	Yes	No	Yes
< 65	White	Male	Adenocarcinoma	T3	N3	≤3	Yes	No	Yes	No
< 65	White	Female	Adenocarcinoma	T2a	N3	≤3	No	Yes	No	No
< 65	White	Female	Adenocarcinoma	T1a	N3	≤3	No	No	No	No
< 65	White	Female	Adenocarcinoma	T1a	N3	≤3	No	Yes	No	No
< 65	White	Male	Adenocarcinoma	T1a	N3	≤3	No	Yes	No	No
≥ 65	White	Male	Adenocarcinoma	T1a	N3	≤3	No	Yes	No	No
≥ 65	White	Male	Adenocarcinoma	T1a	N3	≤3	No	Yes	No	No
≥ 65	White	Female	Adenocarcinoma	T4	N3	≤3	No	No	No	Yes
≥ 65	White	Male	Adenocarcinoma	T4	N3	≤3	Yes	No	No	Yes
≥ 65	White	Female	Adenocarcinoma	T4	N3	≤3	Yes	Yes	No	Yes
≥ 65	White	Male	Adenocarcinoma	T1a	N3	≤3	No	No	No	No
≥ 65	White	Male	Adenocarcinoma	T1a	N3	≤3	No	No	No	No
≥ 65	White	Female	Adenocarcinoma	T4	N3	≤3	No	No	No	Yes
≥ 65	White	Female	Adenocarcinoma	T4	N3	≤3	No	No	No	Yes
≥ 65	White	Male	Adenocarcinoma	T4	N3	≤3	Yes	Yes	No	Yes
≥ 65	White	Male	Adenocarcinoma	T1a	N3	≤3	Yes	No	No	No
≥ 65	White	Male	Adenocarcinoma	T4	N3	≤3	Yes	No	Yes	Yes
< 65	White	Female	Squamous	T1a	N3	≤3	No	No	No	No
< 65	White	Male	Squamous	T3	N3	≤3	No	No	No	Yes
≥ 65	White	Female	Squamous	T4	N3	≤3	No	No	Yes	No
≥ 65	White	Female	Squamous	T4	N3	≤3	Yes	No	No	Yes
≥ 65	White	Female	Squamous	T2a	N3	≤3	Yes	No	No	No
< 65	Others	Male	Adenocarcinoma	T3	N2	≤3	No	No	Yes	Yes
≥ 65	Others	Male	Adenocarcinoma	T4	N2	≤3	Yes	No	No	Yes
≥ 65	Others	Female	Adenocarcinoma	T4	N2	≤3	Yes	No	No	Yes
≥ 65	Others	Female	Adenocarcinoma	T2a	N2	≤3	No	Yes	No	No
< 65	Others	Male	Squamous	T1a	N2	≤3	No	No	Yes	No
< 65	Black	Female	Adenocarcinoma	T4	N2	≤3	No	No	No	No
< 65	Black	Male	Adenocarcinoma	T4	N2	≤3	No	No	No	Yes
< 65	Black	Female	Adenocarcinoma	T2a	N2	≤3	No	Yes	No	No
< 65	Black	Female	Adenocarcinoma	T2a	N2	≤3	No	No	No	No
< 65	Black	Male	Adenocarcinoma	T1a	N2	≤3	Yes	No	Yes	No
≥ 65	Black	Female	Adenocarcinoma	T2a	N2	≤3	Yes	No	Yes	No
≥ 65	Black	Male	Adenocarcinoma	T1a	N2	≤3	Yes	Yes	No	No
≥ 65	Black	Female	Adenocarcinoma	T4	N2	≤3	No	No	No	Yes
≥ 65	Black	Female	Adenocarcinoma	T1a	N2	≤3	Yes	No	No	No
≥ 65	Black	Male	Adenocarcinoma	T3	N2	≤3	Yes	No	No	Yes
≥ 65	Black	Male	Squamous	T3	N2	≤3	No	No	No	Yes
< 65	White	Female	Adenocarcinoma	T3	N2	≤3	Yes	No	No	No
< 65	White	Female	Adenocarcinoma	T1a	N2	≤3	Yes	No	No	No
< 65	White	Female	Adenocarcinoma	T3	N2	≤3	No	No	No	No
< 65	White	Female	Adenocarcinoma	T1a	N2	≤3	No	No	No	No
< 65	White	Female	Adenocarcinoma	T4	N2	≤3	No	Yes	No	No
< 65	White	Male	Adenocarcinoma	T4	N2	≤3	Yes	No	Yes	No
< 65	White	Male	Adenocarcinoma	T1NOS	N2	≤3	No	No	No	No
< 65	White	Female	Adenocarcinoma	T1a	N2	≤3	No	Yes	No	No
< 65	White	Female	Adenocarcinoma	T1a	N2	≤3	No	Yes	No	No
< 65	White	Male	Adenocarcinoma	T1a	N2	≤3	Yes	No	No	No
< 65	White	Male	Adenocarcinoma	T4	N2	≤3	No	No	No	No
< 65	White	Female	Adenocarcinoma	T3	N2	≤3	Yes	Yes	Yes	Yes
< 65	White	Female	Adenocarcinoma	T2a	N2	≤3	No	Yes	No	No
< 65	White	Male	Adenocarcinoma	T1a	N2	≤3	Yes	No	No	No
< 65	White	Male	Adenocarcinoma	T1a	N2	≤3	Yes	Yes	No	No
< 65	White	Female	Adenocarcinoma	T4	N2	≤3	No	No	No	Yes
< 65	White	Female	Adenocarcinoma	T4	N2	≤3	No	No	No	Yes
< 65	White	Male	Adenocarcinoma	T4	N2	≤3	Yes	Yes	Yes	Yes
< 65	White	Female	Adenocarcinoma	T3	N2	≤3	Yes	No	Yes	Yes
< 65	White	Female	Adenocarcinoma	T3	N2	≤3	Yes	Yes	No	No
< 65	White	Female	Adenocarcinoma	T2a	N2	≤3	No	Yes	No	No
< 65	White	Female	Adenocarcinoma	T2a	N2	≤3	No	Yes	No	No
< 65	White	Female	Adenocarcinoma	T1a	N2	≤3	No	No	No	No
< 65	White	Male	Adenocarcinoma	T1a	N2	≤3	No	No	Yes	No
< 65	White	Male	Adenocarcinoma	T1a	N2	≤3	No	Yes	No	No
< 65	White	Male	Adenocarcinoma	T1a	N2	≤3	Yes	No	No	No
< 65	White	Male	Adenocarcinoma	T1a	N2	≤3	Yes	No	No	No
< 65	White	Female	Adenocarcinoma	T1a	N2	≤3	Yes	No	Yes	Yes
≥ 65	White	Female	Adenocarcinoma	T4	N2	≤3	Yes	No	Yes	Yes
≥ 65	White	Male	Adenocarcinoma	T4	N2	≤3	Yes	No	Yes	Yes
≥ 65	White	Female	Adenocarcinoma	T4	N2	≤3	Yes	Yes	No	Yes
≥ 65	White	Male	Adenocarcinoma	T3	N2	≤3	Yes	No	No	Yes
≥ 65	White	Male	Adenocarcinoma	T1a	N2	≤3	No	No	Yes	No
≥ 65	White	Male	Adenocarcinoma	T1a	N2	≤3	Yes	No	Yes	No
≥ 65	White	Male	Adenocarcinoma	T4	N2	≤3	No	No	No	No
≥ 65	White	Male	Adenocarcinoma	T4	N2	≤3	No	No	No	Yes
≥ 65	White	Female	Adenocarcinoma	T4	N2	≤3	Yes	No	No	Yes
≥ 65	White	Male	Adenocarcinoma	T4	N2	≤3	Yes	Yes	No	Yes
≥ 65	White	Male	Adenocarcinoma	T3	N2	≤3	No	No	No	No
≥ 65	White	Male	Adenocarcinoma	T1NOS	N2	≤3	No	No	No	Yes
≥ 65	White	Male	Adenocarcinoma	T1a	N2	≤3	No	No	No	No
≥ 65	White	Male	Adenocarcinoma	T1a	N2	≤3	Yes	No	No	No
≥ 65	White	Male	Adenocarcinoma	T1a	N2	≤3	Yes	No	Yes	No
≥ 65	White	Female	Adenocarcinoma	T4	N2	≤3	No	No	No	Yes
≥ 65	White	Female	Adenocarcinoma	T4	N2	≤3	No	No	No	Yes
≥ 65	White	Male	Adenocarcinoma	T3	N2	≤3	No	No	No	No
≥ 65	White	Female	Adenocarcinoma	T3	N2	≤3	No	No	Yes	Yes
≥ 65	White	Male	Adenocarcinoma	T2a	N2	≤3	No	No	No	No
≥ 65	White	Male	Adenocarcinoma	T2a	N2	≤3	No	No	No	No
≥ 65	White	Male	Adenocarcinoma	T4	N2	≤3	Yes	Yes	No	Yes
≥ 65	White	Male	Adenocarcinoma	T3	N2	≤3	Yes	No	No	Yes
≥ 65	White	Female	Adenocarcinoma	T1a	N2	≤3	No	No	No	No
≥ 65	White	Female	Adenocarcinoma	T4	N2	≤3	No	No	No	No
< 65	White	Male	Squamous	T2a	N2	≤3	No	Yes	No	No
< 65	White	Male	Squamous	T4	N2	≤3	No	No	Yes	No
< 65	White	Male	Squamous	T1a	N2	≤3	No	No	No	No
< 65	White	Female	Squamous	T1a	N2	≤3	No	No	No	Yes
< 65	White	Male	Squamous	T4	N2	≤3	No	No	No	No
< 65	White	Male	Squamous	T4	N2	≤3	No	No	No	Yes
< 65	White	Male	Squamous	T4	N2	≤3	Yes	No	Yes	Yes
< 65	White	Male	Squamous	T3	N2	≤3	Yes	No	No	Yes
≥ 65	White	Male	Squamous	T4	N2	≤3	No	No	Yes	Yes
≥ 65	White	Male	Squamous	T1a	N2	≤3	Yes	No	No	No
≥ 65	White	Male	Squamous	T1a	N2	≤3	Yes	No	Yes	No
≥ 65	White	Male	Squamous	T4	N2	≤3	No	No	No	No
< 65	Others	Male	Adenocarcinoma	T2a	N1	≤3	No	No	No	No
≥ 65	Others	Male	Adenocarcinoma	T2a	N1	≤3	No	No	No	Yes
< 65	Black	Female	Adenocarcinoma	T1a	N1	≤3	No	No	No	No
< 65	White	Female	Adenocarcinoma	T4	N1	≤3	No	Yes	No	Yes
< 65	White	Male	Adenocarcinoma	T4	N1	≤3	Yes	Yes	No	No
< 65	White	Male	Adenocarcinoma	T1a	N1	≤3	Yes	No	No	No
< 65	White	Female	Adenocarcinoma	T1a	N1	≤3	No	No	No	No
≥ 65	White	Male	Adenocarcinoma	T4	N1	≤3	Yes	No	No	No
≥ 65	White	Female	Adenocarcinoma	T1a	N1	≤3	No	No	No	No
≥ 65	White	Female	Adenocarcinoma	T1a	N1	≤3	Yes	No	No	No
≥ 65	White	Male	Adenocarcinoma	T2a	N1	≤3	No	No	No	No
≥ 65	White	Female	Squamous	T3	N1	≤3	No	Yes	No	No
≥ 65	White	Male	Squamous	T1a	N1	≤3	No	No	No	No
≥ 65	White	Female	Squamous	T1a	N1	≤3	No	No	No	No
≥ 65	Others	Male	Adenocarcinoma	T2a	N0	≤3	No	No	No	No
< 65	Black	Male	Adenocarcinoma	T1a	N0	≤3	No	Yes	No	Yes
< 65	Black	Female	Adenocarcinoma	T1a	N0	≤3	Yes	No	Yes	No
< 65	White	Female	Adenocarcinoma	T4	N0	≤3	No	No	No	Yes
< 65	White	Female	Adenocarcinoma	T4	N0	≤3	No	No	No	No
< 65	White	Male	Adenocarcinoma	T1a	N0	≤3	No	Yes	No	No
< 65	White	Male	Adenocarcinoma	T1a	N0	≤3	No	Yes	No	No
< 65	White	Female	Adenocarcinoma	T1a	N0	≤3	Yes	No	No	No
< 65	White	Female	Adenocarcinoma	T4	N0	≤3	Yes	No	No	No
< 65	White	Male	Adenocarcinoma	T3	N0	≤3	No	No	No	No
< 65	White	Female	Adenocarcinoma	T1a	N0	≤3	No	Yes	No	No
< 65	White	Male	Adenocarcinoma	T1a	N0	≤3	Yes	No	No	No
< 65	White	Male	Adenocarcinoma	T1a	N0	≤3	Yes	Yes	No	No
< 65	White	Male	Adenocarcinoma	T1a	N0	≤3	Yes	Yes	Yes	No
< 65	White	Female	Adenocarcinoma	T3	N0	≤3	No	No	No	No
< 65	White	Male	Adenocarcinoma	T1a	N0	≤3	No	Yes	No	No
≥ 65	White	Female	Adenocarcinoma	T4	N0	≤3	No	Yes	No	No
≥ 65	White	Female	Adenocarcinoma	T1a	N0	≤3	No	No	Yes	No
≥ 65	White	Female	Adenocarcinoma	T1a	N0	≤3	No	Yes	No	No
≥ 65	White	Male	Adenocarcinoma	T1a	N0	≤3	Yes	No	No	No
≥ 65	White	Female	Adenocarcinoma	T1a	N0	≤3	Yes	No	No	No
≥ 65	White	Male	Adenocarcinoma	T1a	N0	≤3	Yes	No	Yes	No
≥ 65	White	Female	Adenocarcinoma	T1a	N0	≤3	Yes	Yes	Yes	No
≥ 65	White	Male	Adenocarcinoma	T4	N0	≤3	No	No	No	No
≥ 65	White	Female	Adenocarcinoma	T4	N0	≤3	No	No	No	Yes
≥ 65	White	Male	Adenocarcinoma	T1a	N0	≤3	No	No	No	Yes
≥ 65	White	Female	Adenocarcinoma	T1a	N0	≤3	No	No	Yes	No
≥ 65	White	Female	Adenocarcinoma	T4	N0	≤3	No	No	No	No
≥ 65	White	Male	Adenocarcinoma	T4	N0	≤3	No	No	No	No
≥ 65	White	Female	Adenocarcinoma	T2a	N0	≤3	Yes	Yes	Yes	No
≥ 65	White	Male	Adenocarcinoma	T1a	N0	≤3	No	No	No	No
≥ 65	White	Male	Adenocarcinoma	T1a	N0	≤3	Yes	No	No	No
≥ 65	White	Male	Adenocarcinoma	T1a	N0	≤3	Yes	Yes	No	No
≥ 65	White	Female	Adenocarcinoma	T3	N0	≤3	No	No	No	Yes
≥ 65	White	Female	Adenocarcinoma	T2a	N0	≤3	No	No	No	No
≥ 65	White	Male	Adenocarcinoma	T2a	N0	≤3	No	No	No	No
≥ 65	White	Male	Adenocarcinoma	T1a	N0	≤3	No	No	No	No
≥ 65	White	Male	Adenocarcinoma	T1a	N0	≤3	No	No	No	No
≥ 65	White	Female	Adenocarcinoma	T1a	N0	≤3	Yes	No	No	No
< 65	White	Male	Squamous	T4	N0	≤3	Yes	Yes	No	No
≥ 65	White	Male	Squamous	T3	N0	≤3	No	No	No	No
< 65	Others	Female	Adenocarcinoma	T1a	N3	≤3	No	No	No	No
< 65	Others	Female	Adenocarcinoma	T3	N3	≤3	No	No	No	No
< 65	Others	Female	Adenocarcinoma	T3	N3	≤3	No	No	Yes	No
< 65	Others	Male	Adenocarcinoma	T3	N3	≤3	Yes	Yes	No	Yes
≥ 65	Others	Female	Adenocarcinoma	T1a	N3	≤3	No	No	No	No
< 65	Black	Male	Adenocarcinoma	T4	N3	≤3	No	Yes	No	No
< 65	Black	Female	Adenocarcinoma	T4	N3	≤3	Yes	No	No	No
< 65	Black	Male	Adenocarcinoma	T4	N3	≤3	Yes	No	No	No
< 65	Black	Female	Adenocarcinoma	T1a	N3	≤3	No	No	No	No
< 65	Black	Female	Adenocarcinoma	T4	N3	≤3	Yes	No	Yes	No
≥ 65	White	Female	Adenocarcinoma	T3	N3	≤3	No	No	No	Yes
< 65	White	Male	Adenocarcinoma	T4	N3	≤3	Yes	No	No	No
< 65	White	Female	Adenocarcinoma	T1a	N3	≤3	No	Yes	No	No
< 65	White	Female	Adenocarcinoma	T4	N3	≤3	Yes	No	No	Yes
< 65	White	Female	Adenocarcinoma	T4	N3	≤3	Yes	No	Yes	Yes
< 65	White	Female	Adenocarcinoma	T3	N3	≤3	No	No	No	No
< 65	White	Female	Adenocarcinoma	T3	N3	≤3	No	No	No	Yes
< 65	White	Female	Adenocarcinoma	T1a	N3	≤3	No	No	No	No
< 65	White	Male	Adenocarcinoma	T1a	N3	≤3	No	Yes	No	No
< 65	White	Female	Adenocarcinoma	T1a	N3	≤3	Yes	No	No	No
< 65	White	Female	Adenocarcinoma	T4	N3	≤3	Yes	No	No	No
< 65	White	Female	Adenocarcinoma	T3	N3	≤3	No	No	No	Yes
< 65	White	Male	Adenocarcinoma	T3	N3	≤3	No	Yes	No	No
< 65	White	Male	Adenocarcinoma	T2a	N3	≤3	No	No	No	No
< 65	White	Female	Adenocarcinoma	T1a	N3	≤3	No	Yes	No	No
< 65	White	Female	Adenocarcinoma	T1a	N3	≤3	No	Yes	No	No
< 65	White	Male	Adenocarcinoma	T1a	N3	≤3	Yes	Yes	No	No
< 65	White	Male	Adenocarcinoma	T4	N3	≤3	No	No	No	No
< 65	White	Female	Adenocarcinoma	T4	N3	≤3	No	No	No	Yes
< 65	White	Male	Adenocarcinoma	T4	N3	≤3	No	Yes	No	No
< 65	White	Male	Adenocarcinoma	T4	N3	≤3	Yes	No	No	No
< 65	White	Male	Adenocarcinoma	T4	N3	≤3	Yes	Yes	No	Yes
< 65	White	Male	Adenocarcinoma	T3	N3	≤3	No	No	No	No
< 65	White	Male	Adenocarcinoma	T2a	N3	≤3	No	No	Yes	No
< 65	White	Male	Adenocarcinoma	T1a	N3	≤3	No	No	No	No
< 65	White	Male	Adenocarcinoma	T1a	N3	≤3	No	No	No	No
< 65	White	Female	Adenocarcinoma	T1a	N3	≤3	No	Yes	No	No
< 65	White	Male	Adenocarcinoma	T1a	N3	≤3	Yes	No	No	Yes
< 65	White	Male	Adenocarcinoma	T1a	N3	≤3	Yes	Yes	No	No
≥ 65	White	Female	Adenocarcinoma	T4	N3	≤3	No	Yes	Yes	Yes
≥ 65	White	Male	Adenocarcinoma	T3	N3	≤3	No	No	No	No
≥ 65	White	Female	Adenocarcinoma	T1a	N3	≤3	No	No	No	No
≥ 65	White	Male	Adenocarcinoma	T1a	N3	≤3	No	Yes	No	No
≥ 65	White	Male	Adenocarcinoma	T1a	N3	≤3	No	Yes	No	No
≥ 65	White	Male	Adenocarcinoma	T1a	N3	≤3	Yes	No	No	No
≥ 65	White	Male	Adenocarcinoma	T1a	N3	≤3	Yes	No	No	No
≥ 65	White	Female	Adenocarcinoma	T1a	N3	≤3	Yes	No	Yes	No
≥ 65	White	Male	Adenocarcinoma	T4	N3	≤3	No	No	No	No
≥ 65	White	Male	Adenocarcinoma	T1NOS	N3	≤3	No	No	Yes	No
≥ 65	White	Female	Adenocarcinoma	T1a	N3	≤3	No	Yes	No	No
≥ 65	White	Female	Adenocarcinoma	T1a	N3	≤3	Yes	No	No	No
≥ 65	White	Male	Adenocarcinoma	T3	N3	≤3	No	No	Yes	Yes
≥ 65	White	Female	Adenocarcinoma	T3	N3	≤3	Yes	Yes	No	No
≥ 65	White	Female	Adenocarcinoma	T2a	N3	≤3	No	Yes	No	No
≥ 65	White	Female	Adenocarcinoma	T1a	N3	≤3	No	No	No	No
≥ 65	White	Female	Adenocarcinoma	T1a	N3	≤3	No	No	No	Yes
≥ 65	White	Male	Adenocarcinoma	T1a	N3	≤3	Yes	Yes	No	No
≥ 65	White	Male	Adenocarcinoma	T4	N3	≤3	No	No	No	Yes
≥ 65	White	Male	Adenocarcinoma	T4	N3	≤3	Yes	Yes	No	No
≥ 65	White	Male	Adenocarcinoma	T4	N3	≤3	Yes	Yes	No	Yes
≥ 65	White	Male	Adenocarcinoma	T1a	N3	≤3	No	No	No	No
< 65	White	Male	Squamous	T1a	N3	≤3	No	No	No	No
< 65	White	Female	Squamous	T3	N3	≤3	Yes	Yes	Yes	No
< 65	White	Female	Squamous	T1a	N3	≤3	No	No	No	No
< 65	White	Male	Squamous	T1a	N3	≤3	No	Yes	No	No
≥ 65	White	Male	Squamous	T3	N3	≤3	No	No	No	No
≥ 65	White	Female	Squamous	T1a	N3	≤3	No	No	No	No
≥ 65	White	Female	Squamous	T1a	N3	≤3	No	No	No	No
≥ 65	White	Female	Squamous	T3	N3	≤3	No	No	No	Yes
< 65	Others	Male	Adenocarcinoma	T1a	N2	≤3	No	Yes	No	No
< 65	Others	Male	Adenocarcinoma	T4	N2	≤3	No	No	No	Yes
≥ 65	Others	Female	Adenocarcinoma	T1a	N2	≤3	No	No	No	No
≥ 65	Others	Male	Adenocarcinoma	T4	N2	≤3	No	No	Yes	No
≥ 65	Others	Male	Adenocarcinoma	T4	N2	≤3	Yes	No	No	No
< 65	Black	Female	Adenocarcinoma	T4	N2	≤3	Yes	No	Yes	No
< 65	Black	Female	Adenocarcinoma	T1a	N2	≤3	No	Yes	No	No
< 65	Black	Male	Adenocarcinoma	T4	N2	≤3	No	Yes	No	Yes
< 65	Black	Male	Adenocarcinoma	T3	N2	≤3	No	Yes	No	No
< 65	Black	Female	Adenocarcinoma	T1a	N2	≤3	No	Yes	No	No
< 65	Black	Male	Adenocarcinoma	T3	N2	≤3	No	No	No	No
< 65	Black	Female	Adenocarcinoma	T4	N2	≤3	No	No	No	Yes
≥ 65	Black	Male	Adenocarcinoma	T3	N2	≤3	Yes	No	Yes	No
≥ 65	Black	Male	Adenocarcinoma	T1a	N2	≤3	No	No	No	No
≥ 65	Black	Male	Squamous	T3	N2	≤3	Yes	No	No	No
< 65	White	Male	Adenocarcinoma	T4	N2	≤3	Yes	Yes	Yes	No
< 65	White	Female	Adenocarcinoma	T1a	N2	≤3	No	No	No	No
< 65	White	Male	Adenocarcinoma	T1a	N2	≤3	No	Yes	No	No
< 65	White	Male	Adenocarcinoma	T4	N2	≤3	No	Yes	Yes	Yes
< 65	White	Female	Adenocarcinoma	T1a	N2	≤3	No	No	Yes	No
< 65	White	Male	Adenocarcinoma	T1a	N2	≤3	Yes	No	No	No
< 65	White	Male	Adenocarcinoma	T1a	N2	≤3	Yes	No	No	No
< 65	White	Male	Adenocarcinoma	T1a	N2	≤3	Yes	No	No	No
< 65	White	Female	Adenocarcinoma	T4	N2	≤3	No	Yes	No	No
< 65	White	Male	Adenocarcinoma	T4	N2	≤3	Yes	No	No	No
< 65	White	Female	Adenocarcinoma	T4	N2	≤3	Yes	Yes	Yes	Yes
< 65	White	Female	Adenocarcinoma	T4	N2	≤3	Yes	Yes	Yes	Yes
< 65	White	Female	Adenocarcinoma	T3	N2	≤3	No	No	No	No
< 65	White	Male	Adenocarcinoma	T3	N2	≤3	No	No	No	Yes
< 65	White	Female	Adenocarcinoma	T3	N2	≤3	No	Yes	Yes	Yes
< 65	White	Female	Adenocarcinoma	T3	N2	≤3	Yes	Yes	No	No
< 65	White	Female	Adenocarcinoma	T3	N2	≤3	Yes	Yes	No	Yes
< 65	White	Female	Adenocarcinoma	T3	N2	≤3	Yes	Yes	No	Yes
< 65	White	Male	Adenocarcinoma	T1a	N2	≤3	No	No	No	No
< 65	White	Male	Adenocarcinoma	T1a	N2	≤3	No	Yes	No	No
< 65	White	Male	Adenocarcinoma	T1a	N2	≤3	No	Yes	No	No
< 65	White	Female	Adenocarcinoma	T1a	N2	≤3	No	Yes	No	No
< 65	White	Male	Adenocarcinoma	T1a	N2	≤3	Yes	No	No	No
< 65	White	Male	Adenocarcinoma	T1a	N2	≤3	Yes	Yes	No	No
< 65	White	Male	Adenocarcinoma	T1a	N2	≤3	Yes	Yes	No	No
< 65	White	Male	Adenocarcinoma	T4	N2	≤3	No	Yes	No	No
< 65	White	Female	Adenocarcinoma	T3	N2	≤3	No	No	No	No
< 65	White	Male	Adenocarcinoma	T3	N2	≤3	No	No	Yes	Yes
< 65	White	Female	Adenocarcinoma	T3	N2	≤3	No	Yes	No	No
< 65	White	Male	Adenocarcinoma	T2a	N2	≤3	Yes	Yes	No	No
< 65	White	Male	Adenocarcinoma	T1a	N2	≤3	No	No	No	No
< 65	White	Female	Adenocarcinoma	T1a	N2	≤3	No	Yes	Yes	No
< 65	White	Male	Adenocarcinoma	T1a	N2	≤3	Yes	No	No	No
< 65	White	Female	Adenocarcinoma	T1a	N2	≤3	Yes	No	No	No
< 65	White	Male	Adenocarcinoma	T1a	N2	≤3	Yes	Yes	No	No
≥ 65	White	Male	Adenocarcinoma	T4	N2	≤3	No	No	No	No
≥ 65	White	Male	Adenocarcinoma	T4	N2	≤3	No	No	No	Yes
≥ 65	White	Male	Adenocarcinoma	T3	N2	≤3	No	No	No	No
≥ 65	White	Male	Adenocarcinoma	T3	N2	≤3	Yes	No	No	No
≥ 65	White	Female	Adenocarcinoma	T3	N2	≤3	Yes	No	No	No
≥ 65	White	Female	Adenocarcinoma	T3	N2	≤3	Yes	No	No	No
≥ 65	White	Female	Adenocarcinoma	T3	N2	≤3	Yes	No	Yes	No
≥ 65	White	Male	Adenocarcinoma	T2a	N2	≤3	Yes	No	No	No
≥ 65	White	Female	Adenocarcinoma	T2a	N2	≤3	Yes	Yes	No	No
≥ 65	White	Female	Adenocarcinoma	T2a	N2	≤3	Yes	Yes	No	No
≥ 65	White	Female	Adenocarcinoma	T1a	N2	≤3	No	No	No	No
≥ 65	White	Male	Adenocarcinoma	T1a	N2	≤3	No	No	No	No
≥ 65	White	Male	Adenocarcinoma	T1a	N2	≤3	No	No	Yes	No
≥ 65	White	Female	Adenocarcinoma	T1a	N2	≤3	No	Yes	No	No
≥ 65	White	Male	Adenocarcinoma	T1a	N2	≤3	No	Yes	No	No
≥ 65	White	Male	Adenocarcinoma	T1a	N2	≤3	No	Yes	No	No
≥ 65	White	Female	Adenocarcinoma	T1a	N2	≤3	No	Yes	No	No
≥ 65	White	Male	Adenocarcinoma	T1a	N2	≤3	Yes	No	No	No
≥ 65	White	Female	Adenocarcinoma	T4	N2	≤3	No	No	No	Yes
≥ 65	White	Female	Adenocarcinoma	T4	N2	≤3	No	Yes	No	No
≥ 65	White	Female	Adenocarcinoma	T4	N2	≤3	No	Yes	Yes	Yes
≥ 65	White	Female	Adenocarcinoma	T4	N2	≤3	Yes	No	No	No
≥ 65	White	Male	Adenocarcinoma	T4	N2	≤3	Yes	No	No	No
≥ 65	White	Male	Adenocarcinoma	T3	N2	≤3	No	Yes	No	No
≥ 65	White	Male	Adenocarcinoma	T2a	N2	≤3	No	No	No	No
≥ 65	White	Female	Adenocarcinoma	T1a	N2	≤3	No	No	No	No
≥ 65	White	Male	Adenocarcinoma	T1a	N2	≤3	No	No	No	Yes
≥ 65	White	Female	Adenocarcinoma	T1a	N2	≤3	Yes	No	No	No
≥ 65	White	Female	Adenocarcinoma	T2a	N2	≤3	No	No	No	Yes
≥ 65	White	Male	Adenocarcinoma	T1a	N2	≤3	No	No	No	No
≥ 65	White	Female	Adenocarcinoma	T1a	N2	≤3	No	No	No	No
≥ 65	White	Male	Adenocarcinoma	T1a	N2	≤3	No	No	No	No
≥ 65	White	Female	Adenocarcinoma	T1a	N2	≤3	No	No	No	No
≥ 65	White	Female	Adenocarcinoma	T1a	N2	≤3	No	Yes	No	Yes
≥ 65	White	Male	Adenocarcinoma	T1a	N2	≤3	Yes	No	No	No
≥ 65	White	Female	Adenocarcinoma	T4	N2	≤3	No	No	No	No
≥ 65	White	Female	Adenocarcinoma	T4	N2	≤3	No	No	No	Yes
≥ 65	White	Male	Adenocarcinoma	T3	N2	≤3	No	No	No	No
≥ 65	White	Female	Adenocarcinoma	T3	N2	≤3	No	No	No	Yes
≥ 65	White	Male	Adenocarcinoma	T3	N2	≤3	No	No	Yes	Yes
≥ 65	White	Female	Adenocarcinoma	T4	N2	≤3	No	No	No	No
≥ 65	White	Female	Adenocarcinoma	T1a	N2	≤3	No	No	No	No
< 65	White	Female	Squamous	T4	N2	≤3	No	No	No	No
< 65	White	Female	Squamous	T4	N2	≤3	No	No	No	No
< 65	White	Male	Squamous	T1a	N2	≤3	No	No	No	Yes
< 65	White	Female	Squamous	T4	N2	≤3	Yes	No	No	Yes
< 65	White	Male	Squamous	T3	N2	≤3	Yes	No	No	No
≥ 65	White	Female	Squamous	T2a	N2	≤3	No	Yes	No	Yes
≥ 65	White	Female	Squamous	T4	N2	≤3	Yes	Yes	No	Yes
≥ 65	White	Female	Squamous	T1a	N2	≤3	No	No	No	No
≥ 65	White	Male	Squamous	T1a	N2	≤3	Yes	No	No	No
≥ 65	White	Male	Squamous	T2a	N2	≤3	No	No	No	Yes
≥ 65	White	Male	Squamous	T1a	N2	≤3	No	No	No	No
< 65	Others	Female	Adenocarcinoma	T1a	N1	≤3	No	No	Yes	No
< 65	Black	Male	Adenocarcinoma	T2a	N1	≤3	No	No	No	No
< 65	Black	Female	Adenocarcinoma	T1a	N1	≤3	Yes	No	No	No
≥ 65	Black	Male	Adenocarcinoma	T4	N1	≤3	No	No	No	Yes
≥ 65	Black	Female	Squamous	T1a	N1	≤3	No	No	Yes	No
< 65	White	Female	Adenocarcinoma	T3	N1	≤3	Yes	No	No	Yes
< 65	White	Female	Adenocarcinoma	T1a	N1	≤3	No	Yes	No	No
< 65	White	Female	Adenocarcinoma	T3	N1	≤3	No	No	No	No
< 65	White	Female	Adenocarcinoma	T1a	N1	≤3	No	Yes	No	No
< 65	White	Female	Adenocarcinoma	T1a	N1	≤3	Yes	No	No	No
< 65	White	Male	Adenocarcinoma	T1a	N1	≤3	No	Yes	No	No
< 65	White	Male	Adenocarcinoma	T4	N1	≤3	No	No	No	Yes
< 65	White	Female	Adenocarcinoma	T2a	N1	≤3	Yes	No	No	No
< 65	White	Female	Adenocarcinoma	T1a	N1	≤3	No	No	Yes	No
< 65	White	Female	Adenocarcinoma	T1a	N1	≤3	Yes	No	No	No
≥ 65	White	Male	Adenocarcinoma	T1a	N1	≤3	No	No	No	Yes
≥ 65	White	Female	Adenocarcinoma	T1a	N1	≤3	No	Yes	No	No
≥ 65	White	Male	Adenocarcinoma	T1a	N1	≤3	No	Yes	No	No
≥ 65	White	Female	Adenocarcinoma	T1a	N1	≤3	Yes	No	No	No
≥ 65	White	Female	Adenocarcinoma	T1a	N1	≤3	Yes	No	No	No
≥ 65	White	Male	Adenocarcinoma	T4	N1	≤3	Yes	No	No	No
≥ 65	White	Female	Adenocarcinoma	T3	N1	≤3	No	No	No	Yes
≥ 65	White	Male	Adenocarcinoma	T3	N1	≤3	Yes	No	No	No
< 65	White	Male	Squamous	T4	N1	≤3	No	No	No	No
< 65	White	Male	Squamous	T1a	N1	≤3	Yes	Yes	No	No
≥ 65	White	Male	Squamous	T1a	N1	≤3	Yes	No	No	No
≥ 65	White	Male	Squamous	T1a	N1	≤3	No	No	No	Yes
< 65	Others	Male	Adenocarcinoma	T1a	N0	≤3	No	No	No	No
< 65	Others	Female	Adenocarcinoma	T2a	N0	≤3	No	Yes	No	No
< 65	Others	Male	Adenocarcinoma	T1a	N0	≤3	No	No	No	Yes
≥ 65	Others	Male	Adenocarcinoma	T4	N0	≤3	No	No	No	Yes
≥ 65	Others	Female	Adenocarcinoma	T1a	N0	≤3	No	Yes	No	No
< 65	Black	Male	Adenocarcinoma	T1a	N0	≤3	Yes	No	No	No
< 65	Black	Female	Adenocarcinoma	T1a	N0	≤3	Yes	No	No	No
< 65	Black	Male	Adenocarcinoma	T1a	N0	≤3	Yes	No	No	No
< 65	Black	Male	Adenocarcinoma	T4	N0	≤3	Yes	No	No	Yes
< 65	Black	Male	Adenocarcinoma	T3	N0	≤3	No	No	No	No
< 65	Black	Male	Adenocarcinoma	T3	N0	≤3	No	No	No	No
< 65	Black	Male	Adenocarcinoma	T2a	N0	≤3	No	No	No	No
< 65	Black	Female	Adenocarcinoma	T2a	N0	≤3	No	No	No	No
≥ 65	Black	Female	Adenocarcinoma	T4	N0	≤3	No	No	No	No
≥ 65	Black	Female	Adenocarcinoma	T4	N0	≤3	No	No	No	No
≥ 65	Black	Female	Adenocarcinoma	T3	N0	≤3	No	No	No	Yes
≥ 65	Black	Female	Adenocarcinoma	T1a	N0	≤3	No	Yes	No	No
≥ 65	Black	Male	Adenocarcinoma	T1a	N0	≤3	Yes	No	No	No
≥ 65	Black	Female	Adenocarcinoma	T1a	N0	≤3	No	No	Yes	Yes
≥ 65	Black	Male	Adenocarcinoma	T1a	N0	≤3	Yes	No	No	No
≥ 65	Black	Female	Adenocarcinoma	T4	N0	≤3	No	No	No	Yes
≥ 65	Black	Female	Squamous	T1a	N0	≤3	No	No	No	Yes
< 65	White	Female	Adenocarcinoma	T3	N0	≤3	No	Yes	No	No
< 65	White	Female	Adenocarcinoma	T1a	N0	≤3	No	Yes	No	No
< 65	White	Male	Adenocarcinoma	T1a	N0	≤3	No	Yes	No	No
< 65	White	Female	Adenocarcinoma	T3	N0	≤3	No	No	No	No
< 65	White	Male	Adenocarcinoma	T2a	N0	≤3	No	No	No	No
< 65	White	Male	Adenocarcinoma	T1a	N0	≤3	No	No	No	No
< 65	White	Female	Adenocarcinoma	T4	N0	≤3	No	No	No	No
< 65	White	Male	Adenocarcinoma	T4	N0	≤3	No	No	No	Yes
< 65	White	Male	Adenocarcinoma	T4	N0	≤3	No	No	No	Yes
< 65	White	Female	Adenocarcinoma	T3	N0	≤3	No	No	No	No
< 65	White	Female	Adenocarcinoma	T1a	N0	≤3	Yes	No	No	No
< 65	White	Male	Adenocarcinoma	T4	N0	≤3	No	No	No	No
< 65	White	Male	Adenocarcinoma	T3	N0	≤3	No	No	No	No
< 65	White	Female	Adenocarcinoma	T2a	N0	≤3	Yes	No	Yes	No
< 65	White	Male	Adenocarcinoma	T1a	N0	≤3	No	No	No	No
< 65	White	Female	Adenocarcinoma	T1a	N0	≤3	No	Yes	No	No
< 65	White	Male	Adenocarcinoma	T1a	N0	≤3	No	Yes	No	No
< 65	White	Female	Adenocarcinoma	T1a	N0	≤3	Yes	No	No	No
≥ 65	White	Female	Adenocarcinoma	T4	N0	≤3	Yes	Yes	No	No
≥ 65	White	Female	Adenocarcinoma	T3	N0	≤3	No	No	No	No
≥ 65	White	Female	Adenocarcinoma	T3	N0	≤3	Yes	No	No	No
≥ 65	White	Female	Adenocarcinoma	T1a	N0	≤3	No	No	No	No
≥ 65	White	Female	Adenocarcinoma	T1a	N0	≤3	Yes	Yes	No	No
≥ 65	White	Female	Adenocarcinoma	T4	N0	≤3	No	No	No	Yes
≥ 65	White	Male	Adenocarcinoma	T4	N0	≤3	No	No	No	Yes
≥ 65	White	Female	Adenocarcinoma	T3	N0	≤3	No	No	No	Yes
≥ 65	White	Female	Adenocarcinoma	T3	N0	≤3	Yes	No	No	No
≥ 65	White	Male	Adenocarcinoma	T1a	N0	≤3	No	No	No	No
≥ 65	White	Male	Adenocarcinoma	T1a	N0	≤3	No	No	No	No
≥ 65	White	Female	Adenocarcinoma	T1a	N0	≤3	No	No	No	No
≥ 65	White	Female	Adenocarcinoma	T1a	N0	≤3	No	No	No	Yes
≥ 65	White	Female	Adenocarcinoma	T1a	N0	≤3	No	No	No	Yes
≥ 65	White	Male	Adenocarcinoma	T1a	N0	≤3	No	Yes	No	No
≥ 65	White	Male	Adenocarcinoma	T1a	N0	≤3	Yes	No	No	No
≥ 65	White	Female	Adenocarcinoma	T1a	N0	≤3	Yes	No	No	No
≥ 65	White	Male	Adenocarcinoma	T1a	N0	≤3	Yes	No	No	Yes
≥ 65	White	Male	Adenocarcinoma	T4	N0	≤3	No	No	No	No
≥ 65	White	Male	Adenocarcinoma	T4	N0	≤3	No	No	No	Yes
≥ 65	White	Female	Adenocarcinoma	T4	N0	≤3	No	No	No	Yes
≥ 65	White	Male	Adenocarcinoma	T4	N0	≤3	No	No	No	Yes
≥ 65	White	Male	Adenocarcinoma	T4	N0	≤3	Yes	No	No	No
≥ 65	White	Male	Adenocarcinoma	T2a	N0	≤3	No	No	No	No
≥ 65	White	Female	Adenocarcinoma	T2a	N0	≤3	No	No	No	No
≥ 65	White	Female	Adenocarcinoma	T1a	N0	≤3	No	No	No	Yes
≥ 65	White	Male	Adenocarcinoma	T1a	N0	≤3	No	Yes	No	No
≥ 65	White	Male	Adenocarcinoma	T1a	N0	≤3	Yes	No	No	No
≥ 65	White	Female	Adenocarcinoma	T4	N0	≤3	No	No	No	No
≥ 65	White	Female	Adenocarcinoma	T4	N0	≤3	Yes	No	Yes	Yes
≥ 65	White	Female	Adenocarcinoma	T4	N0	≤3	Yes	Yes	No	No
≥ 65	White	Male	Adenocarcinoma	T3	N0	≤3	No	No	No	No
≥ 65	White	Male	Adenocarcinoma	T3	N0	≤3	No	Yes	No	No
≥ 65	White	Female	Adenocarcinoma	T2a	N0	≤3	No	No	No	No
≥ 65	White	Female	Adenocarcinoma	T1a	N0	≤3	No	No	No	No
≥ 65	White	Male	Adenocarcinoma	T1a	N0	≤3	No	No	No	Yes
≥ 65	White	Female	Adenocarcinoma	T1a	N0	≤3	No	No	No	Yes
≥ 65	White	Male	Adenocarcinoma	T1a	N0	≤3	No	Yes	No	No
≥ 65	White	Female	Adenocarcinoma	T4	N0	≤3	No	No	No	No
≥ 65	White	Female	Adenocarcinoma	T3	N0	≤3	No	No	No	No
≥ 65	White	Female	Adenocarcinoma	T2a	N0	≤3	No	No	No	No
≥ 65	White	Male	Adenocarcinoma	T2a	N0	≤3	No	No	No	No
≥ 65	White	Female	Adenocarcinoma	T1b	N0	≤3	No	No	No	No
≥ 65	White	Male	Squamous	T1a	N0	≤3	No	No	No	Yes
≥ 65	White	Male	Squamous	T4	N0	≤3	No	No	No	No
≥ 65	White	Male	Squamous	T1a	N0	≤3	No	No	No	Yes
≥ 65	White	Female	Squamous	T1a	N0	≤3	No	Yes	No	No
≥ 65	White	Male	Squamous	T1a	N0	≤3	Yes	No	No	No
≥ 65	White	Male	Squamous	T1a	N0	≤3	Yes	No	No	No
≥ 65	White	Female	Squamous	T1a	N0	≤3	Yes	No	No	No
≥ 65	White	Male	Squamous	T3	N0	≤3	No	No	No	Yes
≥ 65	White	Female	Squamous	T3	N0	≤3	Yes	No	No	No
≥ 65	White	Female	Squamous	T1a	N0	≤3	No	No	No	No
< 65	Others	Male	Adenocarcinoma	T1a	N3	≤3	No	No	No	No
< 65	Others	Male	Adenocarcinoma	T2a	N3	≤3	No	No	No	No
< 65	Others	Female	Adenocarcinoma	T1a	N3	≤3	No	Yes	No	No
< 65	Others	Female	Adenocarcinoma	T1a	N3	≤3	No	No	No	No
≥ 65	Others	Female	Adenocarcinoma	T4	N3	≤3	No	No	No	No
≥ 65	Others	Female	Adenocarcinoma	T1a	N3	≤3	No	Yes	No	No
≥ 65	Others	Male	Adenocarcinoma	T1a	N3	≤3	Yes	No	No	No
≥ 65	Others	Male	Squamous	T1a	N3	≤3	Yes	No	Yes	No
≥ 65	Black	Male	Adenocarcinoma	T4	N3	≤3	Yes	No	No	Yes
≥ 65	Black	Male	Adenocarcinoma	T2a	N3	≤3	Yes	No	No	No
≥ 65	Black	Male	Adenocarcinoma	T1a	N3	≤3	Yes	No	No	No
≥ 65	Black	Male	Adenocarcinoma	T4	N3	≤3	No	No	No	Yes
≥ 65	Black	Male	Adenocarcinoma	T3	N3	≤3	Yes	No	Yes	No
≥ 65	Black	Male	Adenocarcinoma	T1a	N3	≤3	No	No	No	No
≥ 65	Black	Female	Squamous	T4	N3	≤3	No	No	No	No
< 65	White	Female	Adenocarcinoma	T4	N3	≤3	No	No	No	No
< 65	White	Male	Adenocarcinoma	T1a	N3	≤3	Yes	No	No	Yes
< 65	White	Male	Adenocarcinoma	T2a	N3	≤3	Yes	No	Yes	No
< 65	White	Male	Adenocarcinoma	T1a	N3	≤3	Yes	No	No	No
< 65	White	Male	Adenocarcinoma	T1a	N3	≤3	No	No	No	Yes
< 65	White	Male	Adenocarcinoma	T1a	N3	≤3	No	Yes	No	No
< 65	White	Male	Adenocarcinoma	T4	N3	≤3	Yes	No	Yes	Yes
< 65	White	Male	Adenocarcinoma	T3	N3	≤3	No	Yes	No	No
< 65	White	Female	Adenocarcinoma	T2NOS	N3	≤3	No	No	No	No
< 65	White	Male	Adenocarcinoma	T2a	N3	≤3	Yes	No	No	No
< 65	White	Male	Adenocarcinoma	T1a	N3	≤3	No	No	No	No
< 65	White	Female	Adenocarcinoma	T1a	N3	≤3	No	Yes	No	No
< 65	White	Female	Adenocarcinoma	T1a	N3	≤3	Yes	Yes	No	No
< 65	White	Male	Adenocarcinoma	T4	N3	≤3	No	No	No	Yes
< 65	White	Female	Adenocarcinoma	T3	N3	≤3	No	No	No	No
< 65	White	Male	Adenocarcinoma	T3	N3	≤3	Yes	No	No	No
< 65	White	Male	Adenocarcinoma	T2NOS	N3	≤3	Yes	No	No	No
< 65	White	Male	Adenocarcinoma	T1a	N3	≤3	No	No	No	No
< 65	White	Female	Adenocarcinoma	T1a	N3	≤3	No	No	Yes	No
< 65	White	Female	Adenocarcinoma	T1a	N3	≤3	No	Yes	No	No
< 65	White	Female	Adenocarcinoma	T1a	N3	≤3	Yes	No	Yes	No
< 65	White	Male	Adenocarcinoma	T1a	N3	≤3	Yes	Yes	No	No
< 65	White	Male	Adenocarcinoma	T2a	N3	≤3	No	No	No	No
< 65	White	Female	Adenocarcinoma	T2a	N3	≤3	No	No	No	No
< 65	White	Male	Adenocarcinoma	T1a	N3	≤3	No	No	No	No
≥ 65	White	Female	Adenocarcinoma	T4	N3	≤3	No	No	No	No
≥ 65	White	Male	Adenocarcinoma	T4	N3	≤3	No	No	No	Yes
≥ 65	White	Female	Adenocarcinoma	T4	N3	≤3	No	No	No	Yes
≥ 65	White	Female	Adenocarcinoma	T3	N3	≤3	No	No	No	No
≥ 65	White	Male	Adenocarcinoma	T3	N3	≤3	No	No	No	Yes
≥ 65	White	Male	Adenocarcinoma	T3	N3	≤3	No	No	Yes	Yes
≥ 65	White	Male	Adenocarcinoma	T3	N3	≤3	Yes	No	No	No
≥ 65	White	Female	Adenocarcinoma	T3	N3	≤3	Yes	No	No	Yes
≥ 65	White	Female	Adenocarcinoma	T1a	N3	≤3	No	No	No	No
≥ 65	White	Female	Adenocarcinoma	T1a	N3	≤3	No	Yes	No	No
≥ 65	White	Male	Adenocarcinoma	T1a	N3	≤3	No	Yes	No	No
≥ 65	White	Male	Adenocarcinoma	T1a	N3	≤3	Yes	Yes	No	No
≥ 65	White	Female	Adenocarcinoma	T4	N3	≤3	No	No	No	No
≥ 65	White	Female	Adenocarcinoma	T4	N3	≤3	No	No	No	No
≥ 65	White	Female	Adenocarcinoma	T4	N3	≤3	No	No	No	Yes
≥ 65	White	Male	Adenocarcinoma	T4	N3	≤3	Yes	Yes	Yes	No
≥ 65	White	Female	Adenocarcinoma	T1a	N3	≤3	No	No	No	No
≥ 65	White	Female	Adenocarcinoma	T1a	N3	≤3	No	No	No	No
≥ 65	White	Female	Adenocarcinoma	T1a	N3	≤3	No	No	No	No
≥ 65	White	Female	Adenocarcinoma	T1a	N3	≤3	No	Yes	No	No
≥ 65	White	Male	Adenocarcinoma	T4	N3	≤3	No	No	No	No
≥ 65	White	Female	Adenocarcinoma	T4	N3	≤3	Yes	No	Yes	Yes
≥ 65	White	Male	Adenocarcinoma	T3	N3	≤3	No	No	No	No
≥ 65	White	Female	Adenocarcinoma	T1a	N3	≤3	No	No	No	No
≥ 65	White	Male	Adenocarcinoma	T4	N3	≤3	No	No	No	Yes
≥ 65	White	Female	Adenocarcinoma	T1a	N3	≤3	No	No	Yes	No
< 65	White	Male	Squamous	T1a	N3	≤3	Yes	No	No	No
≥ 65	White	Male	Squamous	T4	N3	≤3	No	No	No	Yes
≥ 65	White	Male	Squamous	T4	N3	≤3	No	No	No	Yes
≥ 65	White	Male	Squamous	T1a	N3	≤3	Yes	Yes	No	No
≥ 65	White	Female	Squamous	T2b	N3	≤3	No	Yes	No	Yes
≥ 65	White	Female	Squamous	T4	N3	≤3	No	No	Yes	Yes
≥ 65	White	Male	Squamous	T2a	N3	≤3	No	No	No	No
≥ 65	White	Male	Squamous	T1a	N3	≤3	No	No	No	Yes
< 65	Others	Male	Adenocarcinoma	T4	N2	≤3	Yes	No	Yes	Yes
< 65	Others	Female	Adenocarcinoma	T1a	N2	≤3	Yes	No	No	No
≥ 65	Others	Female	Adenocarcinoma	T3	N2	≤3	No	No	No	No
≥ 65	Others	Female	Adenocarcinoma	T3	N2	≤3	No	No	No	No
≥ 65	Others	Female	Adenocarcinoma	T4	N2	≤3	No	No	No	Yes
≥ 65	Others	Male	Adenocarcinoma	T3	N2	≤3	Yes	No	No	Yes
≥ 65	Others	Male	Adenocarcinoma	T1a	N2	≤3	Yes	No	No	No
≥ 65	Others	Female	Adenocarcinoma	T4	N2	≤3	No	No	Yes	Yes
< 65	Others	Male	Squamous	T4	N2	≤3	No	No	No	Yes
< 65	Black	Male	Adenocarcinoma	T4	N2	≤3	No	No	No	No
< 65	Black	Male	Adenocarcinoma	T3	N2	≤3	No	Yes	No	No
< 65	Black	Female	Adenocarcinoma	T1a	N2	≤3	Yes	No	No	No
< 65	Black	Female	Adenocarcinoma	T4	N2	≤3	No	No	No	Yes
< 65	Black	Female	Adenocarcinoma	T4	N2	≤3	Yes	Yes	No	No
< 65	Black	Female	Adenocarcinoma	T4	N2	≤3	No	No	No	Yes
< 65	Black	Female	Adenocarcinoma	T3	N2	≤3	No	Yes	Yes	Yes
< 65	Black	Male	Adenocarcinoma	T4	N2	≤3	No	Yes	No	Yes
< 65	Black	Female	Adenocarcinoma	T3	N2	≤3	Yes	No	No	No
< 65	Black	Male	Adenocarcinoma	T1a	N2	≤3	No	No	No	No
≥ 65	Black	Male	Adenocarcinoma	T4	N2	≤3	No	Yes	No	No
≥ 65	Black	Male	Adenocarcinoma	T4	N2	≤3	Yes	No	No	No
≥ 65	Black	Female	Adenocarcinoma	T1a	N2	≤3	Yes	No	No	No
≥ 65	Black	Female	Adenocarcinoma	T1a	N2	≤3	Yes	No	No	Yes
≥ 65	Black	Female	Adenocarcinoma	T4	N2	≤3	No	Yes	No	No
≥ 65	Black	Female	Adenocarcinoma	T4	N2	≤3	Yes	No	No	No
≥ 65	Black	Female	Adenocarcinoma	T1a	N2	≤3	Yes	No	No	Yes
< 65	White	Male	Adenocarcinoma	T1a	N2	≤3	Yes	No	No	No
< 65	White	Female	Adenocarcinoma	T4	N2	≤3	No	No	No	No
< 65	White	Female	Adenocarcinoma	T1a	N2	≤3	Yes	No	No	No
< 65	White	Male	Adenocarcinoma	T3	N2	≤3	Yes	Yes	No	No
< 65	White	Male	Adenocarcinoma	T4	N2	≤3	Yes	No	Yes	Yes
< 65	White	Female	Adenocarcinoma	T3	N2	≤3	No	No	No	Yes
< 65	White	Female	Adenocarcinoma	T1a	N2	≤3	No	No	Yes	No
< 65	White	Female	Adenocarcinoma	T1a	N2	≤3	No	No	Yes	No
< 65	White	Female	Adenocarcinoma	T1a	N2	≤3	No	Yes	No	No
< 65	White	Male	Adenocarcinoma	T1a	N2	≤3	Yes	No	No	No
< 65	White	Female	Adenocarcinoma	T4	N2	≤3	No	Yes	No	Yes
< 65	White	Female	Adenocarcinoma	T3	N2	≤3	Yes	Yes	No	Yes
< 65	White	Male	Adenocarcinoma	T2a	N2	≤3	No	No	No	No
< 65	White	Female	Adenocarcinoma	T2a	N2	≤3	No	No	Yes	No
< 65	White	Female	Adenocarcinoma	T1a	N2	≤3	No	Yes	No	No
< 65	White	Male	Adenocarcinoma	T1a	N2	≤3	No	Yes	No	No
< 65	White	Female	Adenocarcinoma	T1a	N2	≤3	No	Yes	No	No
< 65	White	Female	Adenocarcinoma	T1a	N2	≤3	Yes	No	Yes	No
< 65	White	Male	Adenocarcinoma	T1a	N2	≤3	Yes	No	Yes	No
< 65	White	Female	Adenocarcinoma	T4	N2	≤3	No	No	No	No
< 65	White	Male	Adenocarcinoma	T4	N2	≤3	No	No	No	Yes
< 65	White	Female	Adenocarcinoma	T4	N2	≤3	No	No	No	Yes
< 65	White	Female	Adenocarcinoma	T4	N2	≤3	No	Yes	No	No
< 65	White	Female	Adenocarcinoma	T4	N2	≤3	Yes	No	No	No
< 65	White	Male	Adenocarcinoma	T3	N2	≤3	No	No	No	No
< 65	White	Female	Adenocarcinoma	T3	N2	≤3	No	No	No	Yes
< 65	White	Male	Adenocarcinoma	T3	N2	≤3	No	Yes	Yes	Yes
< 65	White	Female	Adenocarcinoma	T2a	N2	≤3	No	No	No	No
< 65	White	Male	Adenocarcinoma	T1a	N2	≤3	No	No	No	No
< 65	White	Male	Adenocarcinoma	T1a	N2	≤3	No	No	Yes	No
< 65	White	Male	Adenocarcinoma	T1a	N2	≤3	Yes	No	No	No
< 65	White	Male	Adenocarcinoma	T1a	N2	≤3	Yes	No	No	No
≥ 65	White	Male	Adenocarcinoma	T4	N2	≤3	No	Yes	Yes	Yes
≥ 65	White	Male	Adenocarcinoma	T4	N2	≤3	Yes	No	No	No
≥ 65	White	Male	Adenocarcinoma	T4	N2	≤3	Yes	No	No	Yes
≥ 65	White	Male	Adenocarcinoma	T4	N2	≤3	Yes	No	Yes	Yes
≥ 65	White	Female	Adenocarcinoma	T3	N2	≤3	No	No	No	No
≥ 65	White	Female	Adenocarcinoma	T3	N2	≤3	No	No	No	No
≥ 65	White	Female	Adenocarcinoma	T3	N2	≤3	Yes	No	No	No
≥ 65	White	Male	Adenocarcinoma	T3	N2	≤3	Yes	No	No	No
≥ 65	White	Female	Adenocarcinoma	T2a	N2	≤3	No	Yes	No	No
≥ 65	White	Female	Adenocarcinoma	T2a	N2	≤3	Yes	No	Yes	No
≥ 65	White	Female	Adenocarcinoma	T1a	N2	≤3	No	No	No	No
≥ 65	White	Female	Adenocarcinoma	T1a	N2	≤3	No	Yes	No	No
≥ 65	White	Female	Adenocarcinoma	T1a	N2	≤3	No	Yes	No	No
≥ 65	White	Male	Adenocarcinoma	T1a	N2	≤3	Yes	No	No	No
≥ 65	White	Male	Adenocarcinoma	T1a	N2	≤3	Yes	No	Yes	No
≥ 65	White	Female	Adenocarcinoma	T1a	N2	≤3	Yes	No	Yes	No
≥ 65	White	Female	Adenocarcinoma	T1a	N2	≤3	Yes	Yes	No	No
≥ 65	White	Male	Adenocarcinoma	T4	N2	≤3	No	No	No	No
≥ 65	White	Male	Adenocarcinoma	T4	N2	≤3	No	No	No	No
≥ 65	White	Female	Adenocarcinoma	T3	N2	≤3	Yes	No	No	Yes
≥ 65	White	Male	Adenocarcinoma	T3	N2	≤3	Yes	No	No	Yes
≥ 65	White	Male	Adenocarcinoma	T3	N2	≤3	Yes	No	Yes	No
≥ 65	White	Female	Adenocarcinoma	T2a	N2	≤3	No	No	No	Yes
≥ 65	White	Female	Adenocarcinoma	T2a	N2	≤3	No	No	No	Yes
≥ 65	White	Male	Adenocarcinoma	T1a	N2	≤3	No	No	No	No
≥ 65	White	Male	Adenocarcinoma	T1a	N2	≤3	No	No	No	No
≥ 65	White	Female	Adenocarcinoma	T1a	N2	≤3	No	No	No	No
≥ 65	White	Female	Adenocarcinoma	T1a	N2	≤3	Yes	No	No	No
≥ 65	White	Male	Adenocarcinoma	T1a	N2	≤3	Yes	No	No	No
≥ 65	White	Male	Adenocarcinoma	T1a	N2	≤3	Yes	No	No	No
≥ 65	White	Male	Adenocarcinoma	T4	N2	≤3	No	No	No	No
≥ 65	White	Male	Adenocarcinoma	T4	N2	≤3	Yes	No	No	No
≥ 65	White	Female	Adenocarcinoma	T3	N2	≤3	No	No	No	Yes
≥ 65	White	Male	Adenocarcinoma	T3	N2	≤3	No	Yes	No	No
≥ 65	White	Female	Adenocarcinoma	T3	N2	≤3	Yes	No	Yes	No
≥ 65	White	Male	Adenocarcinoma	T2a	N2	≤3	Yes	No	No	No
≥ 65	White	Male	Adenocarcinoma	T1a	N2	≤3	No	No	No	No
≥ 65	White	Female	Adenocarcinoma	T1a	N2	≤3	No	No	No	No
≥ 65	White	Female	Adenocarcinoma	T1a	N2	≤3	No	No	No	Yes
≥ 65	White	Female	Adenocarcinoma	T1a	N2	≤3	Yes	No	No	No
≥ 65	White	Female	Adenocarcinoma	T4	N2	≤3	Yes	No	No	No
≥ 65	White	Female	Adenocarcinoma	T3	N2	≤3	No	Yes	No	No
≥ 65	White	Female	Adenocarcinoma	T1a	N2	≤3	No	No	No	No
≥ 65	White	Male	Adenocarcinoma	T1a	N2	≤3	No	Yes	No	No
≥ 65	White	Female	Adenocarcinoma	T1a	N2	≤3	Yes	No	No	No
≥ 65	White	Female	Adenocarcinoma	T4	N2	≤3	No	Yes	No	Yes
≥ 65	White	Female	Adenocarcinoma	T3	N2	≤3	Yes	No	No	No
≥ 65	White	Male	Adenocarcinoma	T1a	N2	≤3	No	No	No	No
≥ 65	White	Female	Adenocarcinoma	T1a	N2	≤3	Yes	No	No	No
≥ 65	White	Female	Squamous	T1NOS	N2	≤3	No	No	No	No
≥ 65	White	Male	Squamous	T4	N2	≤3	No	No	Yes	No
< 65	White	Male	Squamous	T1a	N2	≤3	Yes	No	Yes	No
< 65	White	Male	Squamous	T1a	N2	≤3	Yes	No	Yes	No
≥ 65	White	Male	Squamous	T3	N2	≤3	No	No	No	No
≥ 65	White	Female	Squamous	T3	N2	≤3	No	No	No	Yes
≥ 65	White	Male	Squamous	T1a	N2	≤3	Yes	Yes	Yes	No
≥ 65	White	Male	Squamous	T4	N2	≤3	No	No	No	Yes
≥ 65	White	Female	Squamous	T4	N2	≤3	No	No	No	Yes
≥ 65	White	Male	Squamous	T3	N2	≤3	No	Yes	No	No
≥ 65	White	Female	Squamous	T4	N2	≤3	Yes	No	No	No
≥ 65	White	Female	Squamous	T2a	N2	≤3	No	No	No	No
≥ 65	White	Male	Squamous	T3	N2	≤3	No	No	Yes	Yes
≥ 65	White	Female	Squamous	T2a	N2	≤3	No	No	No	No
≥ 65	White	Female	Squamous	T1a	N2	≤3	No	No	No	No
< 65	Black	Male	Adenocarcinoma	T1a	N1	≤3	Yes	Yes	Yes	No
< 65	Black	Female	Adenocarcinoma	T4	N1	≤3	No	Yes	No	No
< 65	Black	Female	Adenocarcinoma	T4	N1	≤3	No	No	No	Yes
< 65	White	Female	Adenocarcinoma	T3	N1	≤3	No	Yes	No	No
< 65	White	Female	Adenocarcinoma	T3	N1	≤3	Yes	Yes	No	No
< 65	White	Female	Adenocarcinoma	T1a	N1	≤3	Yes	No	Yes	Yes
< 65	White	Male	Adenocarcinoma	T1a	N1	≤3	Yes	No	No	No
< 65	White	Female	Adenocarcinoma	T1a	N1	≤3	No	Yes	No	No
< 65	White	Female	Adenocarcinoma	T1a	N1	≤3	No	Yes	No	No
< 65	White	Female	Adenocarcinoma	T1a	N1	≤3	Yes	Yes	Yes	No
≥ 65	White	Female	Adenocarcinoma	T3	N1	≤3	No	No	No	Yes
≥ 65	White	Female	Adenocarcinoma	T1a	N1	≤3	No	No	No	No
≥ 65	White	Female	Adenocarcinoma	T4	N1	≤3	Yes	No	Yes	No
≥ 65	White	Male	Adenocarcinoma	T1a	N1	≤3	Yes	No	No	No
≥ 65	White	Male	Adenocarcinoma	T1a	N1	≤3	Yes	Yes	No	No
≥ 65	White	Female	Adenocarcinoma	T4	N1	≤3	No	No	No	No
≥ 65	White	Male	Adenocarcinoma	T4	N1	≤3	Yes	No	No	Yes
≥ 65	White	Female	Adenocarcinoma	T3	N1	≤3	No	Yes	No	No
≥ 65	White	Female	Adenocarcinoma	T2NOS	N1	≤3	No	Yes	No	No
≥ 65	White	Female	Adenocarcinoma	T1a	N1	≤3	No	Yes	No	Yes
< 65	White	Male	Squamous	T3	N1	≤3	Yes	No	Yes	No
≥ 65	White	Male	Squamous	T3	N1	≤3	No	No	No	Yes
≥ 65	White	Male	Squamous	T2a	N1	≤3	Yes	No	No	No
≥ 65	White	Female	Squamous	T4	N1	≤3	No	No	No	No
< 65	Others	Female	Adenocarcinoma	T1a	N0	≤3	Yes	No	No	No
< 65	Others	Male	Adenocarcinoma	T1a	N0	≤3	Yes	Yes	No	No
< 65	Others	Female	Adenocarcinoma	T3	N0	≤3	No	No	No	No
≥ 65	Others	Male	Adenocarcinoma	T1a	N0	≤3	No	No	No	No
≥ 65	Others	Female	Adenocarcinoma	T3	N0	≤3	No	No	Yes	Yes
≥ 65	Others	Male	Adenocarcinoma	T1a	N0	≤3	No	No	No	No
≥ 65	Others	Male	Adenocarcinoma	T1a	N0	≤3	No	Yes	No	No
< 65	Black	Male	Adenocarcinoma	T4	N0	≤3	No	No	No	No
< 65	Black	Female	Adenocarcinoma	T2a	N0	≤3	No	No	No	Yes
< 65	Black	Female	Adenocarcinoma	T1NOS	N0	≤3	No	No	No	No
< 65	Black	Female	Adenocarcinoma	T1a	N0	≤3	Yes	No	Yes	No
≥ 65	Black	Female	Adenocarcinoma	T1a	N0	≤3	No	No	No	No
≥ 65	Black	Female	Adenocarcinoma	T1a	N0	≤3	No	No	No	Yes
≥ 65	Black	Male	Adenocarcinoma	T1a	N0	≤3	Yes	Yes	No	No
≥ 65	Black	Male	Adenocarcinoma	T3	N0	≤3	No	No	No	No
≥ 65	Black	Male	Adenocarcinoma	T3	N0	≤3	No	No	No	Yes
≥ 65	Black	Male	Adenocarcinoma	T2a	N0	≤3	No	No	No	No
≥ 65	Black	Male	Adenocarcinoma	T4	N0	≤3	No	No	No	No
≥ 65	Black	Female	Adenocarcinoma	T3	N0	≤3	Yes	Yes	Yes	Yes
≥ 65	Black	Male	Adenocarcinoma	T1a	N0	≤3	Yes	No	No	No
≥ 65	Black	Male	Squamous	T3	N0	≤3	No	Yes	No	No
< 65	Black	Male	Squamous	T1a	N0	≤3	Yes	No	No	No
≥ 65	Black	Male	Squamous	T4	N0	≤3	Yes	No	No	No
≥ 65	Black	Male	Squamous	T1a	N0	≤3	No	No	No	No
< 65	White	Female	Adenocarcinoma	T4	N0	≤3	Yes	Yes	No	Yes
< 65	White	Male	Adenocarcinoma	T2a	N0	≤3	No	No	No	No
< 65	White	Male	Adenocarcinoma	T1a	N0	≤3	No	Yes	No	No
< 65	White	Female	Adenocarcinoma	T4	N0	≤3	No	No	No	No
< 65	White	Male	Adenocarcinoma	T3	N0	≤3	No	No	No	No
< 65	White	Male	Adenocarcinoma	T3	N0	≤3	Yes	No	No	Yes
< 65	White	Female	Adenocarcinoma	T2a	N0	≤3	No	Yes	No	No
< 65	White	Female	Adenocarcinoma	T4	N0	≤3	Yes	No	No	No
< 65	White	Male	Adenocarcinoma	T3	N0	≤3	Yes	No	Yes	No
< 65	White	Female	Adenocarcinoma	T1a	N0	≤3	No	Yes	No	No
< 65	White	Male	Adenocarcinoma	T1a	N0	≤3	No	Yes	No	No
≥ 65	White	Male	Adenocarcinoma	T4	N0	≤3	No	No	No	No
≥ 65	White	Female	Adenocarcinoma	T4	N0	≤3	Yes	No	Yes	No
≥ 65	White	Male	Adenocarcinoma	T4	N0	≤3	Yes	Yes	No	No
≥ 65	White	Female	Adenocarcinoma	T3	N0	≤3	No	No	No	No
≥ 65	White	Female	Adenocarcinoma	T3	N0	≤3	No	No	No	No
≥ 65	White	Female	Adenocarcinoma	T2a	N0	≤3	No	No	No	No
≥ 65	White	Female	Adenocarcinoma	T2a	N0	≤3	No	No	No	Yes
≥ 65	White	Female	Adenocarcinoma	T1a	N0	≤3	No	No	No	No
≥ 65	White	Male	Adenocarcinoma	T1a	N0	≤3	No	No	No	No
≥ 65	White	Female	Adenocarcinoma	T1a	N0	≤3	No	No	Yes	No
≥ 65	White	Male	Adenocarcinoma	T1a	N0	≤3	Yes	No	No	No
≥ 65	White	Female	Adenocarcinoma	T1a	N0	≤3	Yes	No	No	No
≥ 65	White	Male	Adenocarcinoma	T4	N0	≤3	No	No	No	No
≥ 65	White	Male	Adenocarcinoma	T4	N0	≤3	No	No	No	Yes
≥ 65	White	Female	Adenocarcinoma	T4	N0	≤3	Yes	No	No	No
≥ 65	White	Female	Adenocarcinoma	T4	N0	≤3	Yes	No	No	No
≥ 65	White	Female	Adenocarcinoma	T4	N0	≤3	Yes	Yes	No	No
≥ 65	White	Female	Adenocarcinoma	T3	N0	≤3	No	No	No	Yes
≥ 65	White	Male	Adenocarcinoma	T3	N0	≤3	Yes	No	No	No
≥ 65	White	Female	Adenocarcinoma	T1a	N0	≤3	No	No	No	No
≥ 65	White	Female	Adenocarcinoma	T1a	N0	≤3	No	No	No	Yes
≥ 65	White	Female	Adenocarcinoma	T1a	N0	≤3	No	Yes	No	No
≥ 65	White	Female	Adenocarcinoma	T1a	N0	≤3	Yes	No	No	No
≥ 65	White	Female	Adenocarcinoma	T1a	N0	≤3	Yes	No	No	No
≥ 65	White	Female	Adenocarcinoma	T3	N0	≤3	Yes	No	No	No
≥ 65	White	Male	Adenocarcinoma	T3	N0	≤3	Yes	No	No	No
≥ 65	White	Female	Adenocarcinoma	T2a	N0	≤3	No	No	No	Yes
≥ 65	White	Male	Adenocarcinoma	T1a	N0	≤3	No	No	No	No
≥ 65	White	Male	Adenocarcinoma	T1a	N0	≤3	No	No	Yes	No
≥ 65	White	Male	Adenocarcinoma	T1a	N0	≤3	Yes	No	No	No
≥ 65	White	Female	Adenocarcinoma	T1a	N0	≤3	Yes	No	No	No
≥ 65	White	Female	Adenocarcinoma	T4	N0	≤3	No	No	No	Yes
≥ 65	White	Female	Adenocarcinoma	T4	N0	≤3	No	No	Yes	Yes
≥ 65	White	Female	Adenocarcinoma	T4	N0	≤3	Yes	No	Yes	No
≥ 65	White	Female	Adenocarcinoma	T3	N0	≤3	No	Yes	No	No
≥ 65	White	Female	Adenocarcinoma	T1a	N0	≤3	Yes	No	No	No
≥ 65	White	Female	Adenocarcinoma	T4	N0	≤3	No	Yes	No	No
≥ 65	White	Male	Adenocarcinoma	T3	N0	≤3	No	No	No	No
≥ 65	White	Male	Adenocarcinoma	T1a	N0	≤3	No	No	No	No
≥ 65	White	Male	Squamous	T1a	N0	≤3	No	No	No	No
< 65	White	Male	Squamous	T1a	N0	≤3	Yes	No	No	No
< 65	White	Male	Squamous	T2a	N0	≤3	No	No	No	No
< 65	White	Male	Squamous	T1a	N0	≤3	No	No	No	Yes
≥ 65	White	Female	Squamous	T4	N0	≤3	No	No	No	Yes
≥ 65	White	Female	Squamous	T1a	N0	≤3	Yes	No	No	No
≥ 65	White	Female	Squamous	T1a	N0	≤3	No	No	No	Yes
≥ 65	White	Male	Squamous	T1a	N0	≤3	Yes	No	No	No
≥ 65	White	Female	Squamous	T1a	N0	≤3	No	No	No	No
≥ 65	White	Female	Squamous	T1a	N0	≤3	No	No	No	Yes
≥ 65	White	Male	Squamous	T1a	N0	≤3	Yes	No	No	No
< 65	Others	Male	Adenocarcinoma	T4	N3	≤3	No	No	No	No
< 65	Others	Male	Adenocarcinoma	T1a	N3	≤3	No	No	No	Yes
≥ 65	Others	Female	Adenocarcinoma	T1a	N3	≤3	No	No	No	No
≥ 65	Others	Male	Adenocarcinoma	T1a	N3	≤3	No	No	No	No
≥ 65	Others	Male	Adenocarcinoma	T1a	N3	≤3	Yes	No	No	No
< 65	Black	Female	Adenocarcinoma	T4	N3	≤3	Yes	No	No	Yes
< 65	Black	Female	Adenocarcinoma	T3	N3	≤3	No	No	No	Yes
< 65	Black	Female	Adenocarcinoma	T3	N3	≤3	No	No	No	Yes
< 65	Black	Female	Adenocarcinoma	T3	N3	≤3	No	Yes	No	Yes
< 65	Black	Female	Adenocarcinoma	T1a	N3	≤3	No	Yes	No	Yes
< 65	Black	Male	Adenocarcinoma	T1a	N3	≤3	No	No	No	No
< 65	Black	Female	Adenocarcinoma	T1a	N3	≤3	No	No	No	Yes
< 65	Black	Female	Adenocarcinoma	T2a	N3	≤3	No	Yes	No	No
≥ 65	Black	Male	Adenocarcinoma	T1a	N3	≤3	No	No	Yes	No
< 65	Black	Male	Squamous	T4	N3	≤3	No	No	No	Yes
< 65	White	Female	Adenocarcinoma	T1a	N3	≤3	Yes	Yes	No	No
< 65	White	Female	Adenocarcinoma	T4	N3	≤3	No	No	No	Yes
< 65	White	Female	Adenocarcinoma	T4	N3	≤3	No	Yes	No	No
< 65	White	Female	Adenocarcinoma	T2a	N3	≤3	Yes	No	No	No
< 65	White	Female	Adenocarcinoma	T1a	N3	≤3	No	No	No	No
< 65	White	Male	Adenocarcinoma	T1a	N3	≤3	Yes	No	No	No
< 65	White	Male	Adenocarcinoma	T4	N3	≤3	Yes	Yes	Yes	Yes
< 65	White	Female	Adenocarcinoma	T3	N3	≤3	No	No	No	No
< 65	White	Female	Adenocarcinoma	T3	N3	≤3	Yes	Yes	Yes	No
< 65	White	Male	Adenocarcinoma	T1NOS	N3	≤3	Yes	No	No	No
< 65	White	Female	Adenocarcinoma	T1a	N3	≤3	No	No	No	No
< 65	White	Female	Adenocarcinoma	T1a	N3	≤3	No	No	No	No
< 65	White	Male	Adenocarcinoma	T1a	N3	≤3	Yes	No	No	Yes
< 65	White	Female	Adenocarcinoma	T1a	N3	≤3	Yes	Yes	No	No
< 65	White	Female	Adenocarcinoma	T3	N3	≤3	No	Yes	No	Yes
< 65	White	Female	Adenocarcinoma	T3	N3	≤3	Yes	No	No	No
< 65	White	Male	Adenocarcinoma	T1a	N3	≤3	No	No	Yes	No
< 65	White	Female	Adenocarcinoma	T1a	N3	≤3	No	Yes	No	No
< 65	White	Male	Adenocarcinoma	T1a	N3	≤3	Yes	No	No	No
< 65	White	Male	Adenocarcinoma	T1a	N3	≤3	Yes	No	Yes	No
< 65	White	Male	Adenocarcinoma	T1a	N3	≤3	Yes	Yes	Yes	No
< 65	White	Female	Adenocarcinoma	T4	N3	≤3	No	No	Yes	Yes
< 65	White	Male	Adenocarcinoma	T3	N3	≤3	No	No	No	Yes
< 65	White	Female	Adenocarcinoma	T3	N3	≤3	No	Yes	No	No
< 65	White	Female	Adenocarcinoma	T2a	N3	≤3	No	Yes	No	No
< 65	White	Male	Adenocarcinoma	T2a	N3	≤3	Yes	Yes	No	No
< 65	White	Male	Adenocarcinoma	T1a	N3	≤3	No	No	No	Yes
< 65	White	Male	Adenocarcinoma	T1a	N3	≤3	No	Yes	No	No
< 65	White	Male	Adenocarcinoma	T1a	N3	≤3	Yes	No	No	No
< 65	White	Male	Adenocarcinoma	T1a	N3	≤3	Yes	No	Yes	No
< 65	White	Female	Adenocarcinoma	T1a	N3	≤3	Yes	No	Yes	No
≥ 65	White	Female	Adenocarcinoma	T4	N3	≤3	No	No	No	Yes
≥ 65	White	Male	Adenocarcinoma	T3	N3	≤3	No	Yes	No	No
≥ 65	White	Female	Adenocarcinoma	T1a	N3	≤3	Yes	No	No	No
≥ 65	White	Male	Adenocarcinoma	T1a	N3	≤3	Yes	No	Yes	No
≥ 65	White	Female	Adenocarcinoma	T3	N3	≤3	No	No	No	No
≥ 65	White	Female	Adenocarcinoma	T3	N3	≤3	Yes	No	No	Yes
≥ 65	White	Female	Adenocarcinoma	T2a	N3	≤3	No	No	No	No
≥ 65	White	Female	Adenocarcinoma	T1a	N3	≤3	No	No	No	No
≥ 65	White	Female	Adenocarcinoma	T1a	N3	≤3	No	No	No	Yes
≥ 65	White	Female	Adenocarcinoma	T1a	N3	≤3	No	Yes	No	No
≥ 65	White	Male	Adenocarcinoma	T4	N3	≤3	No	No	Yes	Yes
≥ 65	White	Female	Adenocarcinoma	T3	N3	≤3	No	No	Yes	Yes
≥ 65	White	Male	Adenocarcinoma	T3	N3	≤3	Yes	No	No	No
≥ 65	White	Female	Adenocarcinoma	T1a	N3	≤3	Yes	No	No	No
≥ 65	White	Female	Adenocarcinoma	T3	N3	≤3	No	No	No	No
< 65	White	Female	Squamous	T4	N3	≤3	Yes	Yes	No	No
< 65	White	Male	Squamous	T4	N3	≤3	No	No	No	Yes
< 65	White	Male	Squamous	T4	N3	≤3	Yes	Yes	No	No
< 65	White	Female	Squamous	T3	N3	≤3	No	No	No	Yes
< 65	White	Female	Squamous	T1a	N3	≤3	No	No	No	No
≥ 65	White	Male	Squamous	T4	N3	≤3	No	No	No	Yes
≥ 65	White	Female	Squamous	T3	N3	≤3	No	No	No	Yes
≥ 65	White	Male	Squamous	T1a	N3	≤3	No	No	No	No
≥ 65	White	Female	Squamous	T1a	N3	≤3	No	Yes	No	No
≥ 65	White	Male	Squamous	T4	N3	≤3	Yes	No	No	No
≥ 65	White	Male	Squamous	T4	N3	≤3	No	No	No	No
< 65	Others	Female	Adenocarcinoma	T2a	N2	≤3	No	No	No	No
< 65	Others	Male	Adenocarcinoma	T2a	N2	≤3	No	No	No	No
< 65	Others	Female	Adenocarcinoma	T4	N2	≤3	No	No	No	Yes
< 65	Others	Male	Adenocarcinoma	T2a	N2	≤3	No	No	No	Yes
≥ 65	Others	Female	Adenocarcinoma	T4	N2	≤3	No	No	No	Yes
≥ 65	Others	Female	Adenocarcinoma	T4	N2	≤3	Yes	Yes	No	Yes
≥ 65	Others	Male	Adenocarcinoma	T1a	N2	≤3	Yes	No	No	Yes
≥ 65	Others	Male	Adenocarcinoma	T2a	N2	≤3	No	Yes	No	No
< 65	Black	Female	Adenocarcinoma	T3	N2	≤3	No	No	No	No
< 65	Black	Female	Adenocarcinoma	T3	N2	≤3	Yes	No	No	No
< 65	Black	Female	Adenocarcinoma	T3	N2	≤3	Yes	No	No	No
< 65	Black	Male	Adenocarcinoma	T4	N2	≤3	No	No	No	Yes
< 65	Black	Male	Adenocarcinoma	T4	N2	≤3	Yes	No	No	No
< 65	Black	Male	Adenocarcinoma	T4	N2	≤3	Yes	No	No	No
< 65	Black	Female	Adenocarcinoma	T1a	N2	≤3	No	No	Yes	No
< 65	Black	Male	Adenocarcinoma	T4	N2	≤3	No	No	No	No
< 65	Black	Male	Adenocarcinoma	T4	N2	≤3	Yes	No	No	No
< 65	Black	Male	Adenocarcinoma	T2a	N2	≤3	No	No	No	Yes
< 65	Black	Male	Adenocarcinoma	T1a	N2	≤3	Yes	No	No	No
≥ 65	Black	Female	Adenocarcinoma	T4	N2	≤3	No	No	No	Yes
≥ 65	Black	Male	Adenocarcinoma	T3	N2	≤3	Yes	No	No	No
≥ 65	Black	Male	Adenocarcinoma	T1a	N2	≤3	No	Yes	No	No
≥ 65	Black	Female	Adenocarcinoma	T2a	N2	≤3	No	No	Yes	No
≥ 65	Black	Male	Adenocarcinoma	T4	N2	≤3	No	No	No	Yes
≥ 65	Black	Male	Adenocarcinoma	T4	N2	≤3	No	No	No	Yes
≥ 65	Black	Male	Adenocarcinoma	T2a	N2	≤3	No	No	No	No
≥ 65	Black	Female	Adenocarcinoma	T2a	N2	≤3	No	Yes	No	No
≥ 65	Black	Female	Squamous	T4	N2	≤3	No	No	No	No
≥ 65	Black	Male	Squamous	T4	N2	≤3	No	No	No	Yes
≥ 65	White	Male	Adenocarcinoma	T4	N2	≤3	No	No	Yes	No
≥ 65	White	Female	Adenocarcinoma	T3	N2	≤3	No	No	No	No
< 65	White	Male	Adenocarcinoma	T4	N2	≤3	Yes	Yes	Yes	Yes
< 65	White	Male	Adenocarcinoma	T2NOS	N2	≤3	Yes	Yes	Yes	Yes
< 65	White	Female	Adenocarcinoma	T2a	N2	≤3	No	Yes	No	No
< 65	White	Female	Adenocarcinoma	T1a	N2	≤3	Yes	No	No	No
< 65	White	Female	Adenocarcinoma	T3	N2	≤3	Yes	No	No	No
< 65	White	Female	Adenocarcinoma	T3	N2	≤3	Yes	Yes	No	Yes
< 65	White	Female	Adenocarcinoma	T2a	N2	≤3	Yes	Yes	No	No
< 65	White	Male	Adenocarcinoma	T1a	N2	≤3	Yes	No	No	No
< 65	White	Female	Adenocarcinoma	T4	N2	≤3	Yes	No	No	No
< 65	White	Female	Adenocarcinoma	T2a	N2	≤3	No	Yes	No	No
< 65	White	Male	Adenocarcinoma	T2a	N2	≤3	Yes	No	Yes	No
< 65	White	Male	Adenocarcinoma	T1a	N2	≤3	No	Yes	No	No
< 65	White	Male	Adenocarcinoma	T1a	N2	≤3	Yes	No	No	No
< 65	White	Female	Adenocarcinoma	T1a	N2	≤3	Yes	No	No	No
< 65	White	Male	Adenocarcinoma	T1a	N2	≤3	Yes	No	No	No
< 65	White	Male	Adenocarcinoma	T1a	N2	≤3	Yes	No	No	No
< 65	White	Male	Adenocarcinoma	T1a	N2	≤3	Yes	No	No	Yes
< 65	White	Female	Adenocarcinoma	T4	N2	≤3	No	No	No	No
< 65	White	Male	Adenocarcinoma	T4	N2	≤3	No	No	No	Yes
< 65	White	Female	Adenocarcinoma	T4	N2	≤3	Yes	Yes	Yes	No
< 65	White	Male	Adenocarcinoma	T3	N2	≤3	Yes	No	Yes	No
< 65	White	Male	Adenocarcinoma	T2a	N2	≤3	No	Yes	No	No
< 65	White	Male	Adenocarcinoma	T2a	N2	≤3	Yes	No	No	Yes
< 65	White	Female	Adenocarcinoma	T2a	N2	≤3	Yes	No	Yes	No
< 65	White	Female	Adenocarcinoma	T1a	N2	≤3	No	No	No	No
< 65	White	Male	Adenocarcinoma	T1a	N2	≤3	No	No	No	No
< 65	White	Female	Adenocarcinoma	T1a	N2	≤3	Yes	No	No	No
< 65	White	Male	Adenocarcinoma	T1a	N2	≤3	Yes	No	No	No
< 65	White	Male	Adenocarcinoma	T1a	N2	≤3	Yes	No	No	No
< 65	White	Male	Adenocarcinoma	T1a	N2	≤3	Yes	No	No	No
< 65	White	Female	Adenocarcinoma	T1a	N2	≤3	Yes	No	No	No
< 65	White	Female	Adenocarcinoma	T1a	N2	≤3	Yes	Yes	No	No
< 65	White	Male	Adenocarcinoma	T4	N2	≤3	No	No	No	No
< 65	White	Female	Adenocarcinoma	T4	N2	≤3	No	No	No	No
< 65	White	Female	Adenocarcinoma	T4	N2	≤3	No	No	No	Yes
< 65	White	Male	Adenocarcinoma	T4	N2	≤3	No	Yes	No	Yes
< 65	White	Female	Adenocarcinoma	T4	N2	≤3	No	Yes	No	Yes
< 65	White	Female	Adenocarcinoma	T4	N2	≤3	Yes	No	No	Yes
< 65	White	Female	Adenocarcinoma	T4	N2	≤3	Yes	Yes	No	Yes
< 65	White	Female	Adenocarcinoma	T3	N2	≤3	No	No	Yes	Yes
< 65	White	Female	Adenocarcinoma	T1a	N2	≤3	No	Yes	No	No
< 65	White	Male	Adenocarcinoma	T1a	N2	≤3	No	Yes	Yes	No
< 65	White	Male	Adenocarcinoma	T1a	N2	≤3	No	Yes	Yes	No
< 65	White	Female	Adenocarcinoma	T1a	N2	≤3	No	Yes	Yes	Yes
< 65	White	Male	Adenocarcinoma	T1a	N2	≤3	Yes	No	No	No
< 65	White	Female	Adenocarcinoma	T1a	N2	≤3	Yes	No	No	No
< 65	White	Male	Adenocarcinoma	T1a	N2	≤3	Yes	No	Yes	No
≥ 65	White	Female	Adenocarcinoma	T4	N2	≤3	No	No	No	Yes
≥ 65	White	Male	Adenocarcinoma	T4	N2	≤3	No	No	No	Yes
≥ 65	White	Female	Adenocarcinoma	T4	N2	≤3	No	No	Yes	No
≥ 65	White	Male	Adenocarcinoma	T4	N2	≤3	No	No	Yes	Yes
≥ 65	White	Male	Adenocarcinoma	T4	N2	≤3	No	No	Yes	Yes
≥ 65	White	Male	Adenocarcinoma	T4	N2	≤3	No	Yes	No	No
≥ 65	White	Male	Adenocarcinoma	T4	N2	≤3	Yes	No	No	No
≥ 65	White	Female	Adenocarcinoma	T4	N2	≤3	Yes	No	No	Yes
≥ 65	White	Male	Adenocarcinoma	T3	N2	≤3	Yes	No	Yes	No
≥ 65	White	Female	Adenocarcinoma	T2a	N2	≤3	No	Yes	No	No
≥ 65	White	Male	Adenocarcinoma	T1a	N2	≤3	No	No	No	Yes
≥ 65	White	Female	Adenocarcinoma	T1a	N2	≤3	Yes	No	No	No
≥ 65	White	Female	Adenocarcinoma	T1a	N2	≤3	Yes	No	No	No
≥ 65	White	Male	Adenocarcinoma	T1a	N2	≤3	Yes	No	No	No
≥ 65	White	Female	Adenocarcinoma	T1a	N2	≤3	Yes	No	Yes	No
≥ 65	White	Female	Adenocarcinoma	T4	N2	≤3	No	No	No	No
≥ 65	White	Male	Adenocarcinoma	T4	N2	≤3	No	No	No	No
≥ 65	White	Female	Adenocarcinoma	T4	N2	≤3	No	Yes	No	No
≥ 65	White	Female	Adenocarcinoma	T4	N2	≤3	Yes	No	No	No
≥ 65	White	Male	Adenocarcinoma	T3	N2	≤3	No	No	No	No
≥ 65	White	Female	Adenocarcinoma	T3	N2	≤3	No	No	No	No
≥ 65	White	Male	Adenocarcinoma	T3	N2	≤3	No	No	No	Yes
≥ 65	White	Female	Adenocarcinoma	T3	N2	≤3	Yes	No	No	No
≥ 65	White	Male	Adenocarcinoma	T3	N2	≤3	Yes	No	No	Yes
≥ 65	White	Male	Adenocarcinoma	T1a	N2	≤3	No	No	No	Yes
≥ 65	White	Male	Adenocarcinoma	T1a	N2	≤3	No	No	Yes	No
≥ 65	White	Male	Adenocarcinoma	T1a	N2	≤3	Yes	No	No	No
≥ 65	White	Male	Adenocarcinoma	T1a	N2	≤3	Yes	No	No	No
≥ 65	White	Female	Adenocarcinoma	T1a	N2	≤3	Yes	No	No	No
≥ 65	White	Female	Adenocarcinoma	T1a	N2	≤3	Yes	No	No	No
≥ 65	White	Male	Adenocarcinoma	T4	N2	≤3	No	No	No	Yes
≥ 65	White	Female	Adenocarcinoma	T4	N2	≤3	Yes	No	No	Yes
≥ 65	White	Male	Adenocarcinoma	T3	N2	≤3	No	No	No	No
≥ 65	White	Female	Adenocarcinoma	T3	N2	≤3	No	No	No	Yes
≥ 65	White	Male	Adenocarcinoma	T3	N2	≤3	Yes	No	No	Yes
≥ 65	White	Female	Adenocarcinoma	T2a	N2	≤3	No	No	No	No
≥ 65	White	Female	Adenocarcinoma	T1a	N2	≤3	No	No	No	No
≥ 65	White	Female	Adenocarcinoma	T1a	N2	≤3	No	No	No	No
≥ 65	White	Male	Adenocarcinoma	T4	N2	≤3	No	No	No	No
≥ 65	White	Male	Adenocarcinoma	T4	N2	≤3	Yes	Yes	No	No
≥ 65	White	Female	Adenocarcinoma	T1a	N2	≤3	No	No	No	No
≥ 65	White	Male	Adenocarcinoma	T1a	N2	≤3	No	No	No	No
≥ 65	White	Male	Adenocarcinoma	T1a	N2	≤3	Yes	No	No	No
≥ 65	White	Female	Adenocarcinoma	T3	N2	≤3	No	Yes	No	No
≥ 65	White	Male	Adenocarcinoma	T3	N2	≤3	Yes	Yes	No	Yes
< 65	White	Male	Squamous	T3	N2	≤3	Yes	No	No	No
< 65	White	Female	Squamous	T3	N2	≤3	No	Yes	No	Yes
< 65	White	Female	Squamous	T2a	N2	≤3	Yes	No	Yes	No
< 65	White	Female	Squamous	T4	N2	≤3	No	No	No	Yes
≥ 65	White	Female	Squamous	T4	N2	≤3	Yes	No	No	No
≥ 65	White	Male	Squamous	T4	N2	≤3	Yes	No	No	No
≥ 65	White	Female	Squamous	T4	N2	≤3	Yes	No	Yes	Yes
≥ 65	White	Female	Squamous	T3	N2	≤3	Yes	No	No	No
≥ 65	White	Male	Squamous	T3	N2	≤3	Yes	No	No	Yes
≥ 65	White	Male	Squamous	T4	N2	≤3	No	Yes	No	Yes
≥ 65	White	Female	Squamous	T3	N2	≤3	No	No	Yes	No
≥ 65	White	Female	Squamous	T1a	N2	≤3	No	Yes	No	No
≥ 65	White	Female	Squamous	T1a	N2	≤3	No	Yes	Yes	No
≥ 65	White	Female	Squamous	T1a	N2	≤3	Yes	No	No	No
≥ 65	White	Male	Squamous	T4	N2	≤3	No	No	No	No
≥ 65	White	Male	Squamous	T4	N2	≤3	No	No	Yes	Yes
≥ 65	White	Female	Squamous	T2a	N2	≤3	Yes	No	No	No
< 65	Others	Female	Adenocarcinoma	T3	N1	≤3	Yes	No	No	No
≥ 65	Others	Female	Adenocarcinoma	T3	N1	≤3	Yes	Yes	No	Yes
≥ 65	Others	Female	Adenocarcinoma	T1a	N1	≤3	No	No	No	No
< 65	Black	Male	Adenocarcinoma	T1a	N1	≤3	No	Yes	No	No
< 65	Black	Female	Adenocarcinoma	T3	N1	≤3	No	No	No	Yes
< 65	Black	Male	Adenocarcinoma	T1a	N1	≤3	No	No	No	No
< 65	White	Female	Adenocarcinoma	T3	N1	≤3	No	No	No	No
< 65	White	Male	Adenocarcinoma	T3	N1	≤3	Yes	No	No	Yes
≥ 65	White	Female	Adenocarcinoma	T3	N1	≤3	No	No	No	No
≥ 65	White	Female	Adenocarcinoma	T3	N1	≤3	No	No	No	Yes
≥ 65	White	Female	Adenocarcinoma	T1a	N1	≤3	No	No	No	No
≥ 65	White	Male	Adenocarcinoma	T1a	N1	≤3	Yes	No	Yes	No
≥ 65	White	Male	Adenocarcinoma	T1a	N1	≤3	No	No	No	No
≥ 65	White	Male	Adenocarcinoma	T1a	N1	≤3	No	No	Yes	Yes
≥ 65	White	Female	Adenocarcinoma	T4	N1	≤3	Yes	No	No	Yes
≥ 65	White	Male	Adenocarcinoma	T1a	N1	≤3	No	No	No	Yes
≥ 65	White	Female	Adenocarcinoma	T4	N1	≤3	No	Yes	Yes	Yes
≥ 65	White	Female	Adenocarcinoma	T1a	N1	≤3	No	No	Yes	No
≥ 65	White	Male	Squamous	T1a	N1	≤3	Yes	No	No	No
≥ 65	White	Female	Squamous	T3	N1	≤3	No	No	No	Yes
< 65	Others	Male	Adenocarcinoma	T1a	N0	≤3	Yes	Yes	Yes	No
≥ 65	Others	Male	Adenocarcinoma	T3	N0	≤3	No	Yes	Yes	No
< 65	Black	Female	Adenocarcinoma	T1NOS	N0	≤3	No	Yes	No	No
< 65	Black	Female	Adenocarcinoma	T3	N0	≤3	No	No	No	No
< 65	Black	Female	Adenocarcinoma	T2a	N0	≤3	No	No	No	No
< 65	Black	Female	Adenocarcinoma	T4	N0	≤3	Yes	No	No	No
< 65	Black	Male	Adenocarcinoma	T1a	N0	≤3	Yes	No	No	No
≥ 65	Black	Male	Adenocarcinoma	T1a	N0	≤3	No	Yes	No	No
≥ 65	Black	Male	Adenocarcinoma	T4	N0	≤3	No	No	No	No
≥ 65	Black	Female	Adenocarcinoma	T4	N0	≤3	No	No	No	Yes
≥ 65	Black	Male	Adenocarcinoma	T1a	N0	≤3	No	Yes	No	No
≥ 65	Black	Male	Adenocarcinoma	T1a	N0	≤3	No	No	No	No
≥ 65	Black	Female	Adenocarcinoma	T2a	N0	≤3	No	No	No	No
≥ 65	Black	Male	Adenocarcinoma	T1a	N0	≤3	No	No	No	No
< 65	White	Female	Adenocarcinoma	T2a	N0	≤3	No	No	No	No
< 65	White	Male	Adenocarcinoma	T2a	N0	≤3	No	Yes	No	No
< 65	White	Female	Adenocarcinoma	T1a	N0	≤3	Yes	Yes	No	No
< 65	White	Male	Adenocarcinoma	T2a	N0	≤3	No	No	No	No
< 65	White	Female	Adenocarcinoma	T1a	N0	≤3	No	No	No	No
< 65	White	Male	Adenocarcinoma	T1a	N0	≤3	Yes	No	No	No
< 65	White	Female	Adenocarcinoma	T4	N0	≤3	No	No	Yes	No
< 65	White	Female	Adenocarcinoma	T4	N0	≤3	No	Yes	No	Yes
< 65	White	Male	Adenocarcinoma	T3	N0	≤3	Yes	No	No	No
< 65	White	Female	Adenocarcinoma	T3	N0	≤3	Yes	No	No	No
< 65	White	Female	Adenocarcinoma	T2a	N0	≤3	No	No	No	No
< 65	White	Male	Adenocarcinoma	T1a	N0	≤3	No	No	No	No
< 65	White	Female	Adenocarcinoma	T1a	N0	≤3	No	No	No	No
< 65	White	Male	Adenocarcinoma	T1a	N0	≤3	No	Yes	No	No
< 65	White	Female	Adenocarcinoma	T1a	N0	≤3	Yes	No	No	No
< 65	White	Male	Adenocarcinoma	T1a	N0	≤3	Yes	No	No	No
< 65	White	Male	Adenocarcinoma	T1a	N0	≤3	Yes	No	No	Yes
< 65	White	Female	Adenocarcinoma	T1a	N0	≤3	Yes	No	Yes	No
< 65	White	Male	Adenocarcinoma	T4	N0	≤3	Yes	No	No	Yes
< 65	White	Female	Adenocarcinoma	T3	N0	≤3	No	Yes	No	Yes
< 65	White	Female	Adenocarcinoma	T2a	N0	≤3	No	No	No	No
< 65	White	Male	Adenocarcinoma	T2a	N0	≤3	Yes	No	Yes	No
< 65	White	Male	Adenocarcinoma	T1a	N0	≤3	No	No	No	Yes
< 65	White	Male	Adenocarcinoma	T1a	N0	≤3	No	Yes	No	No
< 65	White	Male	Adenocarcinoma	T1a	N0	≤3	No	Yes	No	No
< 65	White	Male	Adenocarcinoma	T1a	N0	≤3	Yes	No	No	No
≥ 65	White	Male	Adenocarcinoma	T4	N0	≤3	Yes	No	No	No
≥ 65	White	Female	Adenocarcinoma	T3	N0	≤3	No	No	No	No
≥ 65	White	Female	Adenocarcinoma	T3	N0	≤3	No	No	No	Yes
≥ 65	White	Male	Adenocarcinoma	T3	N0	≤3	No	No	No	Yes
≥ 65	White	Male	Adenocarcinoma	T2a	N0	≤3	No	No	No	No
≥ 65	White	Male	Adenocarcinoma	T1a	N0	≤3	No	Yes	No	No
≥ 65	White	Male	Adenocarcinoma	T1a	N0	≤3	No	Yes	No	No
≥ 65	White	Female	Adenocarcinoma	T1a	N0	≤3	No	Yes	No	No
≥ 65	White	Female	Adenocarcinoma	T1a	N0	≤3	No	Yes	No	No
≥ 65	White	Female	Adenocarcinoma	T1a	N0	≤3	No	Yes	No	No
≥ 65	White	Female	Adenocarcinoma	T4	N0	≤3	No	No	No	No
≥ 65	White	Female	Adenocarcinoma	T4	N0	≤3	No	No	No	Yes
≥ 65	White	Female	Adenocarcinoma	T4	N0	≤3	No	No	Yes	Yes
≥ 65	White	Male	Adenocarcinoma	T4	N0	≤3	Yes	No	No	Yes
≥ 65	White	Female	Adenocarcinoma	T3	N0	≤3	No	No	No	Yes
≥ 65	White	Male	Adenocarcinoma	T3	N0	≤3	No	No	Yes	Yes
≥ 65	White	Female	Adenocarcinoma	T2a	N0	≤3	No	No	No	Yes
≥ 65	White	Male	Adenocarcinoma	T2a	N0	≤3	Yes	Yes	No	No
≥ 65	White	Female	Adenocarcinoma	T1a	N0	≤3	No	No	No	No
≥ 65	White	Male	Adenocarcinoma	T1a	N0	≤3	No	No	No	No
≥ 65	White	Male	Adenocarcinoma	T1a	N0	≤3	No	No	Yes	No
≥ 65	White	Female	Adenocarcinoma	T1a	N0	≤3	Yes	No	No	No
≥ 65	White	Female	Adenocarcinoma	T1a	N0	≤3	Yes	Yes	No	No
≥ 65	White	Male	Adenocarcinoma	T2a	N0	≤3	No	No	No	No
≥ 65	White	Male	Adenocarcinoma	T1a	N0	≤3	No	No	No	No
≥ 65	White	Female	Adenocarcinoma	T1a	N0	≤3	No	Yes	No	No
≥ 65	White	Male	Adenocarcinoma	T1a	N0	≤3	No	Yes	No	No
≥ 65	White	Female	Adenocarcinoma	T1a	N0	≤3	Yes	No	No	No
≥ 65	White	Female	Adenocarcinoma	T3	N0	≤3	No	No	No	Yes
≥ 65	White	Female	Adenocarcinoma	T2a	N0	≤3	No	No	No	No
≥ 65	White	Female	Adenocarcinoma	T1a	N0	≤3	No	Yes	No	No
≥ 65	White	Female	Adenocarcinoma	T1a	N0	≤3	Yes	No	No	No
≥ 65	White	Female	Adenocarcinoma	T1a	N0	≤3	Yes	Yes	Yes	No
≥ 65	White	Male	Adenocarcinoma	T2a	N0	≤3	No	No	No	No
≥ 65	White	Male	Adenocarcinoma	T2a	N0	≤3	No	No	No	No
< 65	White	Male	Squamous	T4	N0	≤3	No	Yes	No	Yes
≥ 65	White	Male	Squamous	T2a	N0	≤3	No	No	No	No
≥ 65	White	Male	Squamous	T4	N0	≤3	No	No	No	Yes
≥ 65	White	Female	Squamous	T3	N0	≤3	No	No	No	No
≥ 65	White	Male	Squamous	T1a	N0	≤3	No	No	No	No
< 65	Others	Male	Adenocarcinoma	T4	N3	≤3	No	Yes	No	No
< 65	Others	Male	Adenocarcinoma	T3	N3	≤3	Yes	No	No	No
< 65	Others	Female	Adenocarcinoma	T1a	N3	≤3	Yes	No	No	No
< 65	Others	Female	Adenocarcinoma	T1a	N3	≤3	Yes	No	No	Yes
< 65	Others	Male	Adenocarcinoma	T1a	N3	≤3	Yes	Yes	No	No
< 65	Others	Female	Adenocarcinoma	T3	N3	≤3	Yes	Yes	No	Yes
< 65	Others	Male	Adenocarcinoma	T1a	N3	≤3	Yes	No	Yes	No
≥ 65	Others	Female	Adenocarcinoma	T3	N3	≤3	No	Yes	No	No
≥ 65	Others	Male	Adenocarcinoma	T3	N3	≤3	Yes	No	Yes	Yes
≥ 65	Others	Female	Adenocarcinoma	T2a	N3	≤3	No	No	No	No
≥ 65	Others	Male	Adenocarcinoma	T3	N3	≤3	Yes	No	No	No
≥ 65	Others	Male	Adenocarcinoma	T1a	N3	≤3	No	No	No	No
≥ 65	Others	Female	Squamous	T3	N3	≤3	No	No	No	No
< 65	Others	Male	Squamous	T4	N3	≤3	No	No	No	Yes
< 65	Others	Female	Squamous	T1a	N3	≤3	No	No	No	No
< 65	Black	Male	Adenocarcinoma	T4	N3	≤3	Yes	No	No	Yes
< 65	Black	Male	Adenocarcinoma	T4	N3	≤3	No	No	No	No
< 65	Black	Female	Adenocarcinoma	T4	N3	≤3	No	No	No	Yes
< 65	Black	Male	Adenocarcinoma	T1a	N3	≤3	No	Yes	No	Yes
< 65	Black	Female	Adenocarcinoma	T1a	N3	≤3	Yes	No	No	No
< 65	Black	Female	Adenocarcinoma	T4	N3	≤3	No	No	Yes	Yes
< 65	Black	Male	Adenocarcinoma	T4	N3	≤3	Yes	No	No	No
< 65	Black	Male	Adenocarcinoma	T4	N3	≤3	Yes	No	No	Yes
< 65	Black	Female	Adenocarcinoma	T3	N3	≤3	No	No	No	Yes
< 65	Black	Male	Adenocarcinoma	T2NOS	N3	≤3	No	No	No	No
< 65	Black	Male	Adenocarcinoma	T2a	N3	≤3	Yes	No	Yes	Yes
< 65	Black	Male	Adenocarcinoma	T4	N3	≤3	No	No	No	No
< 65	Black	Male	Adenocarcinoma	T3	N3	≤3	Yes	No	No	No
< 65	Black	Male	Adenocarcinoma	T1a	N3	≤3	No	No	No	No
< 65	Black	Male	Adenocarcinoma	T1a	N3	≤3	No	Yes	No	No
≥ 65	Black	Female	Adenocarcinoma	T4	N3	≤3	Yes	No	Yes	Yes
≥ 65	Black	Male	Adenocarcinoma	T3	N3	≤3	No	Yes	No	No
≥ 65	Black	Female	Adenocarcinoma	T3	N3	≤3	No	Yes	No	Yes
≥ 65	Black	Male	Adenocarcinoma	T1a	N3	≤3	No	Yes	No	No
≥ 65	Black	Female	Adenocarcinoma	T2NOS	N3	≤3	No	Yes	No	No
≥ 65	Black	Male	Adenocarcinoma	T1a	N3	≤3	No	No	No	No
≥ 65	Black	Male	Adenocarcinoma	T3	N3	≤3	No	No	No	No
< 65	Black	Male	Squamous	T1a	N3	≤3	No	No	No	No
< 65	Black	Male	Squamous	T1a	N3	≤3	Yes	No	Yes	No
< 65	White	Male	Adenocarcinoma	T3	N3	≤3	No	Yes	No	Yes
< 65	White	Male	Adenocarcinoma	T3	N3	≤3	No	No	No	No
< 65	White	Male	Adenocarcinoma	T4	N3	≤3	No	No	No	No
< 65	White	Female	Adenocarcinoma	T2a	N3	≤3	No	Yes	No	No
< 65	White	Female	Adenocarcinoma	T4	N3	≤3	Yes	Yes	Yes	Yes
< 65	White	Female	Adenocarcinoma	T1a	N3	≤3	No	No	No	No
< 65	White	Female	Adenocarcinoma	T1a	N3	≤3	No	No	No	No
< 65	White	Male	Adenocarcinoma	T1a	N3	≤3	No	No	No	No
< 65	White	Male	Adenocarcinoma	T1a	N3	≤3	No	No	No	Yes
< 65	White	Male	Adenocarcinoma	T4	N3	≤3	No	No	No	No
< 65	White	Female	Adenocarcinoma	T4	N3	≤3	No	No	No	Yes
< 65	White	Male	Adenocarcinoma	T4	N3	≤3	Yes	No	Yes	Yes
< 65	White	Male	Adenocarcinoma	T3	N3	≤3	No	No	No	No
< 65	White	Female	Adenocarcinoma	T3	N3	≤3	Yes	Yes	No	Yes
< 65	White	Male	Adenocarcinoma	T1a	N3	≤3	No	Yes	No	No
< 65	White	Male	Adenocarcinoma	T1a	N3	≤3	Yes	No	No	No
< 65	White	Male	Adenocarcinoma	T1a	N3	≤3	Yes	No	No	Yes
< 65	White	Male	Adenocarcinoma	T1a	N3	≤3	Yes	Yes	No	No
< 65	White	Male	Adenocarcinoma	T4	N3	≤3	Yes	No	No	Yes
< 65	White	Male	Adenocarcinoma	T4	N3	≤3	Yes	No	Yes	No
< 65	White	Female	Adenocarcinoma	T3	N3	≤3	No	No	No	No
< 65	White	Female	Adenocarcinoma	T1NOS	N3	≤3	Yes	No	No	No
< 65	White	Male	Adenocarcinoma	T1a	N3	≤3	No	No	No	No
< 65	White	Male	Adenocarcinoma	T1a	N3	≤3	No	No	No	Yes
< 65	White	Male	Adenocarcinoma	T1a	N3	≤3	No	Yes	No	No
< 65	White	Female	Adenocarcinoma	T1a	N3	≤3	Yes	No	No	No
< 65	White	Female	Adenocarcinoma	T1a	N3	≤3	Yes	No	Yes	Yes
≥ 65	White	Female	Adenocarcinoma	T4	N3	≤3	No	No	No	No
≥ 65	White	Female	Adenocarcinoma	T4	N3	≤3	No	No	Yes	Yes
≥ 65	White	Female	Adenocarcinoma	T4	N3	≤3	Yes	No	Yes	Yes
≥ 65	White	Male	Adenocarcinoma	T4	N3	≤3	Yes	Yes	No	Yes
≥ 65	White	Male	Adenocarcinoma	T3	N3	≤3	Yes	No	Yes	Yes
≥ 65	White	Male	Adenocarcinoma	T3	N3	≤3	Yes	No	Yes	Yes
≥ 65	White	Female	Adenocarcinoma	T1a	N3	≤3	No	No	No	No
≥ 65	White	Male	Adenocarcinoma	T1a	N3	≤3	No	No	No	No
≥ 65	White	Male	Adenocarcinoma	T1a	N3	≤3	Yes	Yes	No	No
≥ 65	White	Male	Adenocarcinoma	T4	N3	≤3	No	No	No	Yes
≥ 65	White	Female	Adenocarcinoma	T4	N3	≤3	No	No	No	Yes
≥ 65	White	Male	Adenocarcinoma	T4	N3	≤3	No	Yes	No	Yes
≥ 65	White	Female	Adenocarcinoma	T3	N3	≤3	No	No	No	No
≥ 65	White	Male	Adenocarcinoma	T3	N3	≤3	Yes	No	No	No
≥ 65	White	Female	Adenocarcinoma	T3	N3	≤3	Yes	No	No	Yes
≥ 65	White	Female	Adenocarcinoma	T2a	N3	≤3	Yes	No	Yes	No
≥ 65	White	Male	Adenocarcinoma	T1a	N3	≤3	No	No	No	No
≥ 65	White	Female	Adenocarcinoma	T1a	N3	≤3	No	No	Yes	No
≥ 65	White	Female	Adenocarcinoma	T1a	N3	≤3	No	Yes	No	No
≥ 65	White	Female	Adenocarcinoma	T1a	N3	≤3	Yes	No	No	No
≥ 65	White	Female	Adenocarcinoma	T1a	N3	≤3	Yes	No	No	No
≥ 65	White	Female	Adenocarcinoma	T1a	N3	≤3	Yes	No	No	No
≥ 65	White	Male	Adenocarcinoma	T4	N3	≤3	Yes	No	Yes	No
≥ 65	White	Female	Adenocarcinoma	T4	N3	≤3	Yes	Yes	No	Yes
≥ 65	White	Male	Adenocarcinoma	T3	N3	≤3	No	No	No	Yes
≥ 65	White	Male	Adenocarcinoma	T3	N3	≤3	No	No	No	Yes
≥ 65	White	Male	Adenocarcinoma	T1a	N3	≤3	Yes	Yes	No	No
≥ 65	White	Male	Adenocarcinoma	T1a	N3	≤3	Yes	Yes	No	No
≥ 65	White	Female	Adenocarcinoma	T4	N3	≤3	No	Yes	No	No
≥ 65	White	Female	Adenocarcinoma	T1a	N3	≤3	No	No	No	No
≥ 65	White	Female	Adenocarcinoma	T4	N3	≤3	No	No	No	No
≥ 65	White	Female	Adenocarcinoma	T3	N3	≤3	No	No	No	Yes
≥ 65	White	Female	Adenocarcinoma	T1a	N3	≤3	No	No	No	No
≥ 65	White	Male	Adenocarcinoma	T1a	N3	≤3	Yes	No	No	No
≥ 65	White	Male	Squamous	T4	N3	≤3	Yes	Yes	No	No
≥ 65	White	Male	Squamous	T4	N3	≤3	No	No	No	Yes
< 65	White	Male	Squamous	T4	N3	≤3	Yes	No	No	No
< 65	White	Male	Squamous	T3	N3	≤3	No	No	No	No
< 65	White	Female	Squamous	T4	N3	≤3	Yes	Yes	No	No
< 65	White	Female	Squamous	T1a	N3	≤3	No	No	No	No
< 65	White	Male	Squamous	T3	N3	≤3	No	No	No	No
< 65	White	Male	Squamous	T2a	N3	≤3	No	No	No	Yes
< 65	White	Female	Squamous	T1a	N3	≤3	No	Yes	No	No
≥ 65	White	Female	Squamous	T4	N3	≤3	No	No	No	No
≥ 65	White	Male	Squamous	T3	N3	≤3	No	No	No	Yes
≥ 65	White	Female	Squamous	T2a	N3	≤3	Yes	No	No	No
≥ 65	White	Male	Squamous	T1a	N3	≤3	Yes	No	No	No
≥ 65	White	Female	Squamous	T3	N3	≤3	Yes	No	Yes	No
< 65	Others	Female	Adenocarcinoma	T4	N2	≤3	No	No	No	No
< 65	Others	Male	Adenocarcinoma	T3	N2	≤3	Yes	No	No	No
< 65	Others	Female	Adenocarcinoma	T3	N2	≤3	Yes	Yes	Yes	Yes
< 65	Others	Male	Adenocarcinoma	T4	N2	≤3	No	No	No	No
< 65	Others	Male	Adenocarcinoma	T4	N2	≤3	Yes	No	No	No
< 65	Others	Female	Adenocarcinoma	T4	N2	≤3	No	No	No	No
< 65	Others	Female	Adenocarcinoma	T3	N2	≤3	Yes	No	Yes	No
< 65	Others	Female	Adenocarcinoma	T3	N2	≤3	Yes	Yes	No	No
< 65	Others	Female	Adenocarcinoma	T1a	N2	≤3	No	Yes	No	No
≥ 65	Others	Female	Adenocarcinoma	T4	N2	≤3	Yes	Yes	Yes	Yes
≥ 65	Others	Male	Adenocarcinoma	T1a	N2	≤3	No	No	No	No
≥ 65	Others	Female	Adenocarcinoma	T4	N2	≤3	No	No	No	Yes
≥ 65	Others	Male	Adenocarcinoma	T1a	N2	≤3	Yes	No	No	No
≥ 65	Others	Male	Adenocarcinoma	T1a	N2	≤3	Yes	Yes	No	No
≥ 65	Others	Female	Adenocarcinoma	T4	N2	≤3	No	No	No	No
< 65	Others	Male	Squamous	T3	N2	≤3	Yes	No	No	Yes
≥ 65	Others	Female	Squamous	T3	N2	≤3	No	No	No	Yes
≥ 65	Others	Female	Squamous	T1a	N2	≤3	No	No	No	No
≥ 65	Others	Female	Squamous	T3	N2	≤3	No	No	No	No
< 65	Black	Male	Adenocarcinoma	T4	N2	≤3	No	No	No	No
< 65	Black	Female	Adenocarcinoma	T1a	N2	≤3	No	Yes	No	No
< 65	Black	Male	Adenocarcinoma	T1a	N2	≤3	Yes	No	No	No
< 65	Black	Male	Adenocarcinoma	T1a	N2	≤3	Yes	No	No	No
< 65	Black	Female	Adenocarcinoma	T1a	N2	≤3	Yes	Yes	No	No
< 65	Black	Female	Adenocarcinoma	T4	N2	≤3	Yes	No	No	No
< 65	Black	Male	Adenocarcinoma	T1a	N2	≤3	No	Yes	No	No
< 65	Black	Female	Adenocarcinoma	T1a	N2	≤3	Yes	No	No	No
< 65	Black	Female	Adenocarcinoma	T4	N2	≤3	No	No	No	No
< 65	Black	Female	Adenocarcinoma	T4	N2	≤3	Yes	Yes	No	Yes
[truncated: 38,197 more rows]
